# Supplementary material for: Psychosocial factors of insomnia in depression: a network approach
Source: Springer Nature journal article supplement (doi:10.1186/s12888-023-05454-9), 2023-12-16
Supplement: MOESM3 [file 26536148]

### Additional file 3

|                                                                                                                                                                                            |   |
|--------------------------------------------------------------------------------------------------------------------------------------------------------------------------------------------|---|
| Figure S26 The stability of centrality indices for the network of insomnia without covariates using case-dropping bootstrap. ....                                                          | 4 |
| Figure S27. The stability of centrality indices for the network of insomnia and associated personality without covariates using case-dropping bootstrap.....                               | 4 |
| Figure S28. The stability of centrality indices for the network of insomnia and associated interpersonal disturbance without covariates using case-dropping bootstrap.....                 | 5 |
| Figure S29. The stability of centrality indices for the network of insomnia and associated childhood trauma without covariates using case-dropping bootstrap. ...                          | 5 |
| Figure S30. The stability of centrality indices for the network of insomnia and associated social support without covariates using case-dropping bootstrap. ....                           | 6 |
| Figure S31. The stability of centrality indices for the network of total ISI score and associated integrated psychosocial factors without covariates using case-dropping bootstrap.....    | 6 |
| Figure S32. The stability of centrality indices for the network of insomnia symptoms and associated integrated psychosocial factors without covariates using case-dropping bootstrap. .... | 7 |
| Figure S33. The stability of centrality indices for the network of insomnia with covariates using case-dropping bootstrap. ....                                                            | 7 |
| Figure S34. The stability of centrality indices for the network of insomnia and associated personality with covariates using case-dropping bootstrap.....                                  | 8 |
| Figure S35. The stability of centrality indices for the network of insomnia and associated interpersonal disturbance with covariates using case-dropping bootstrap. ....                   | 8 |
| Figure S36. The stability of centrality indices for the network of insomnia and associated childhood trauma with covariates using case-dropping bootstrap. ....                            | 9 |
| Figure S37. The stability of centrality indices for the network of insomnia and associated social support with covariates using case-dropping bootstrap. ....                              | 9 |

|                                                                                                                                                                                         |    |
|-----------------------------------------------------------------------------------------------------------------------------------------------------------------------------------------|----|
| Figure S38. The stability of centrality indices for the network of total ISI score and associated integrated psychosocial factors with covariates using case-dropping bootstrap.....    | 10 |
| Figure S39. The stability of centrality indices for the network of insomnia symptoms and associated integrated psychosocial factors with covariates using case-dropping bootstrap. .... | 10 |
| Figure S40. Bootstrapped confidence intervals of estimated edge-weights for the network of insomnia without covariates.....                                                             | 11 |
| Figure S41. Bootstrapped confidence intervals of estimated edge-weights for the network of insomnia and associated personality without covariates.....                                  | 13 |
| Figure S42. Bootstrapped confidence intervals of estimated edge-weights for the network of insomnia and associated interpersonal disturbance without covariates. ....                   | 15 |
| Figure S43. Bootstrapped confidence intervals of estimated edge-weights for the network of insomnia and associated childhood trauma without covariates.....                             | 17 |
| Figure S44. Bootstrapped confidence intervals of estimated edge-weights for the network of insomnia and associated social support without covariates. ....                              | 19 |
| Figure S45. Bootstrapped confidence intervals of estimated edge-weights for the network of total ISI score and associated integrated psychosocial factors without covariates. ....      | 21 |
| Figure S46. Bootstrapped confidence intervals of estimated edge-weights for the network of insomnia symptoms and associated integrated psychosocial factors without covariates. ....    | 23 |
| Figure S47. Bootstrapped confidence intervals of estimated edge-weights for the network of insomnia with covariates. ....                                                               | 25 |
| Figure S48. Bootstrapped confidence intervals of estimated edge-weights for the network of insomnia and associated personality with covariates. ....                                    | 27 |
| Figure S49. Bootstrapped confidence intervals of estimated edge-weights for the network of insomnia and associated interpersonal disturbance with covariates...                         | 29 |
| Figure S50. Bootstrapped confidence intervals of estimated edge-weights for the                                                                                                         |    |

|                                                                                                                                                                                   |    |
|-----------------------------------------------------------------------------------------------------------------------------------------------------------------------------------|----|
| network of insomnia and associated childhood trauma with covariates.....                                                                                                          | 31 |
| Figure S51. Bootstrapped confidence intervals of estimated edge-weights for the network of insomnia and associated social support with covariates.....                            | 33 |
| Figure S52. Bootstrapped confidence intervals of estimated edge-weights for the network of total ISI score and associated integrated psychosocial factors with covariates. ....   | 35 |
| Figure S53. Bootstrapped confidence intervals of estimated edge-weights for the network of insomnia symptoms and associated integrated psychosocial factors with covariates. .... | 37 |

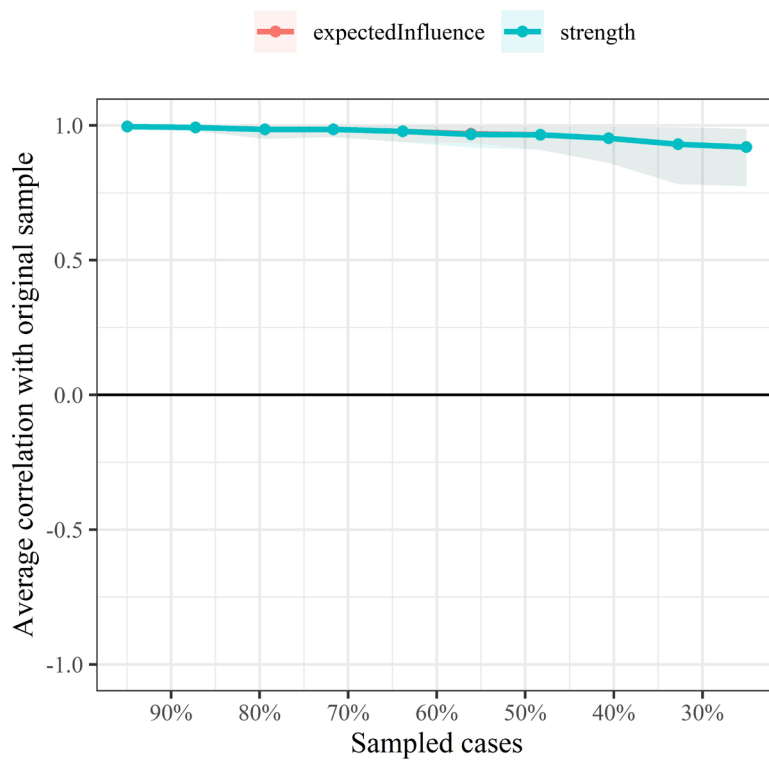

Figure S26 The stability of centrality indices for the network of insomnia without covariates using case-dropping bootstrap.

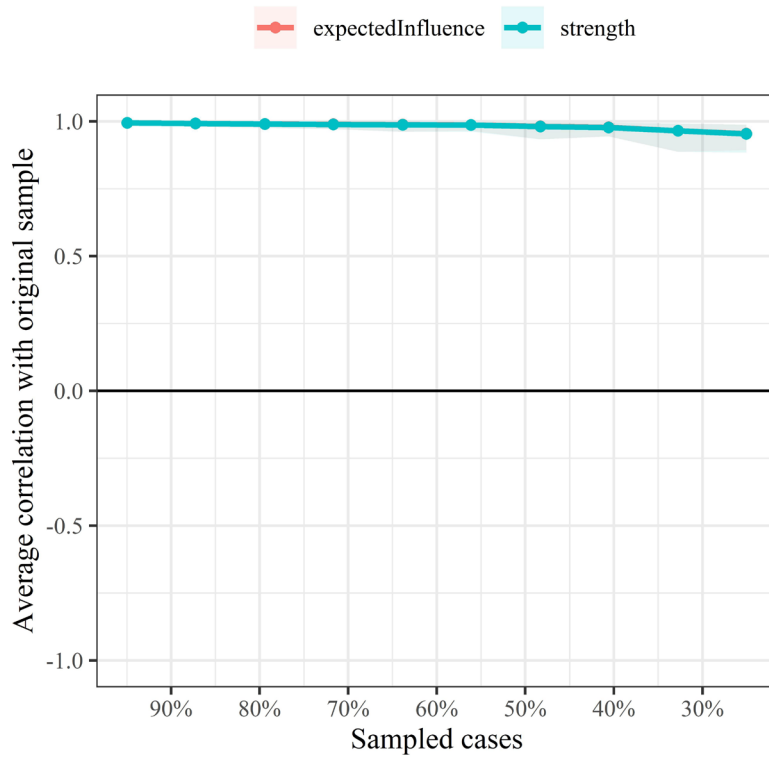

Figure S27. The stability of centrality indices for the network of insomnia and associated personality without covariates using case-dropping bootstrap.

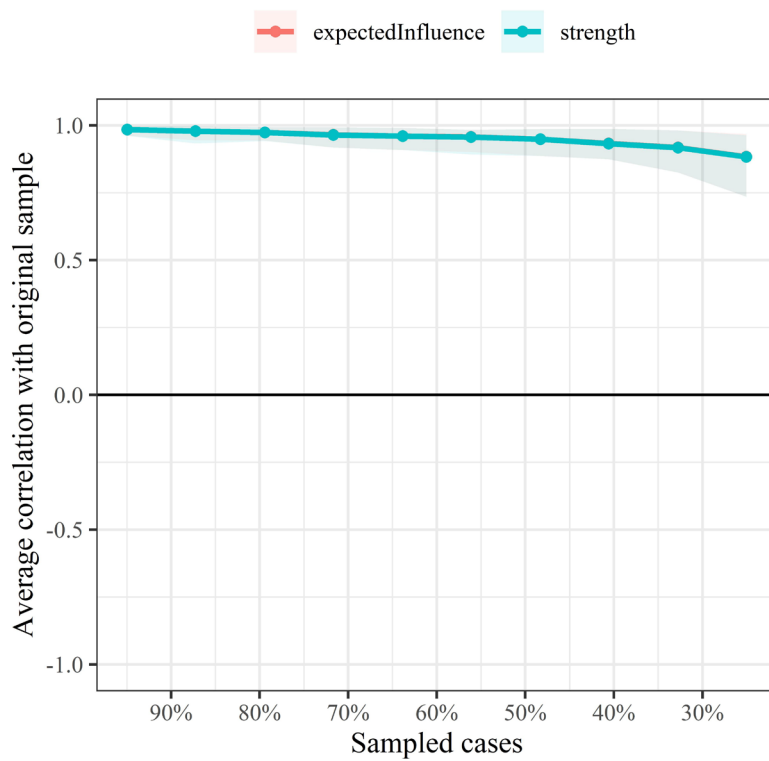

Figure S28. The stability of centrality indices for the network of insomnia and associated interpersonal disturbance without covariates using case-dropping bootstrap.

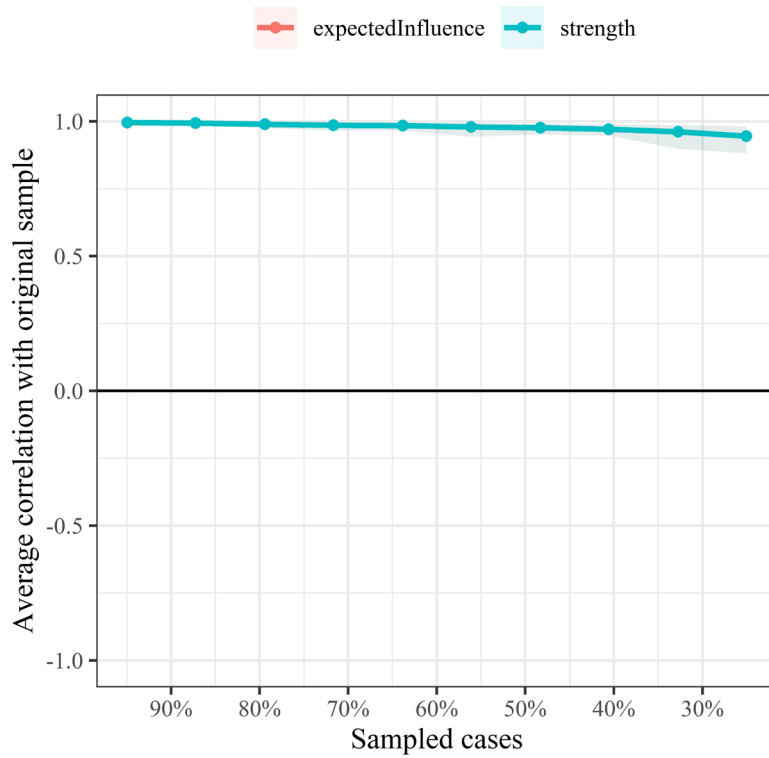

Figure S29. The stability of centrality indices for the network of insomnia and associated childhood trauma without covariates using case-dropping bootstrap.

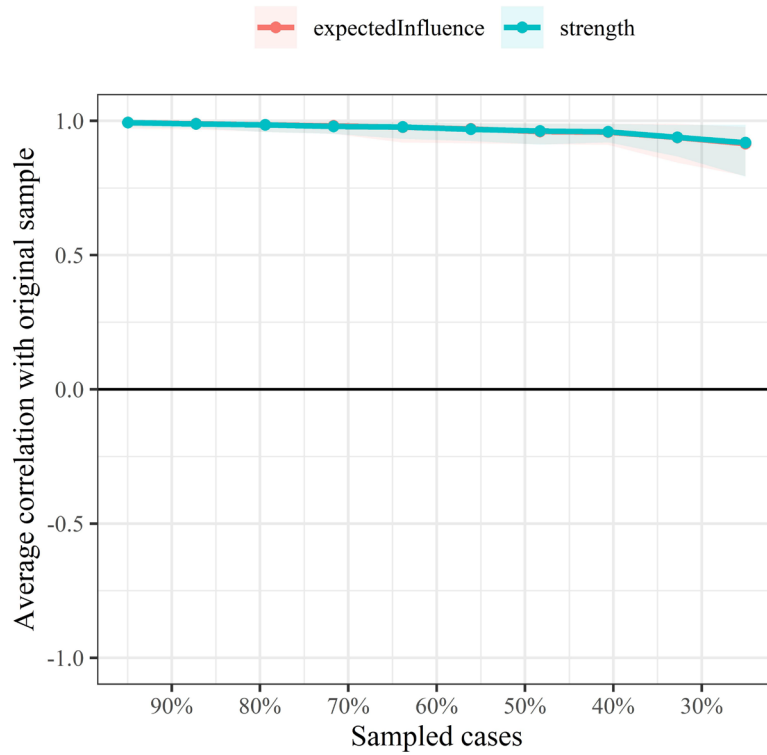

Figure S30. The stability of centrality indices for the network of insomnia and associated social support without covariates using case-dropping bootstrap.

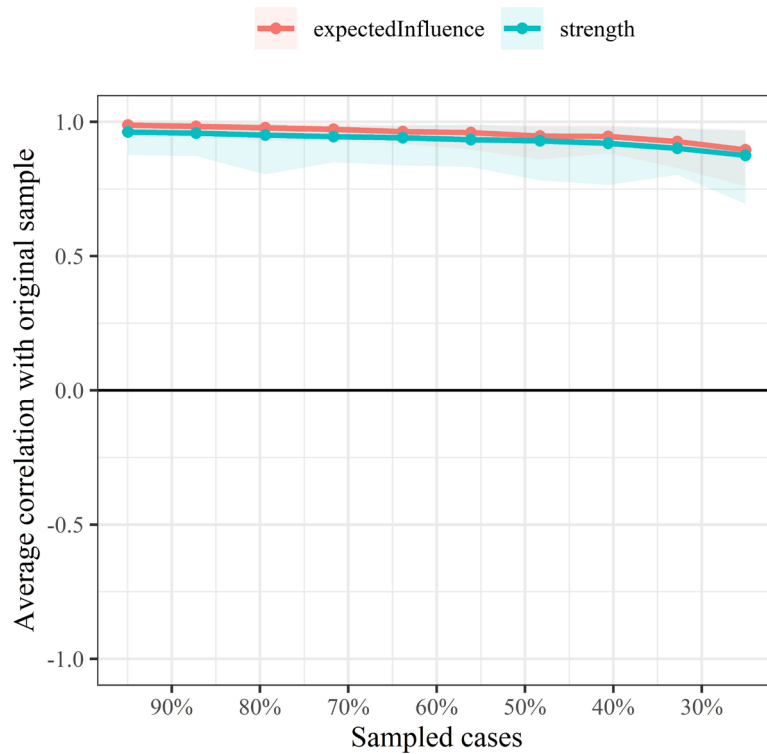

Figure S31. The stability of centrality indices for the network of total ISI score and associated integrated psychosocial factors without covariates using case-dropping bootstrap.

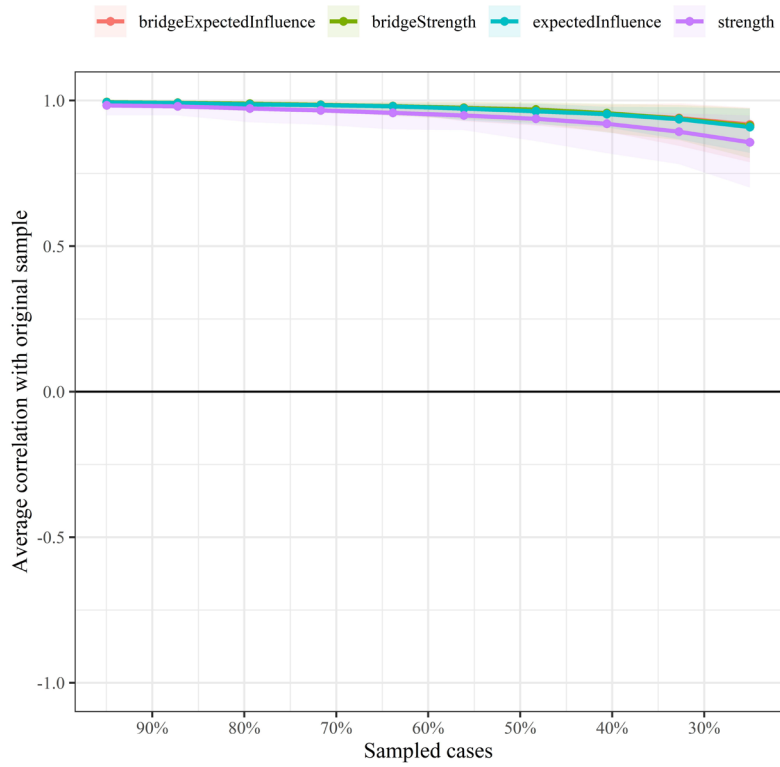

Figure S32. The stability of centrality indices for the network of insomnia symptoms and associated integrated psychosocial factors without covariates using case-dropping bootstrap.

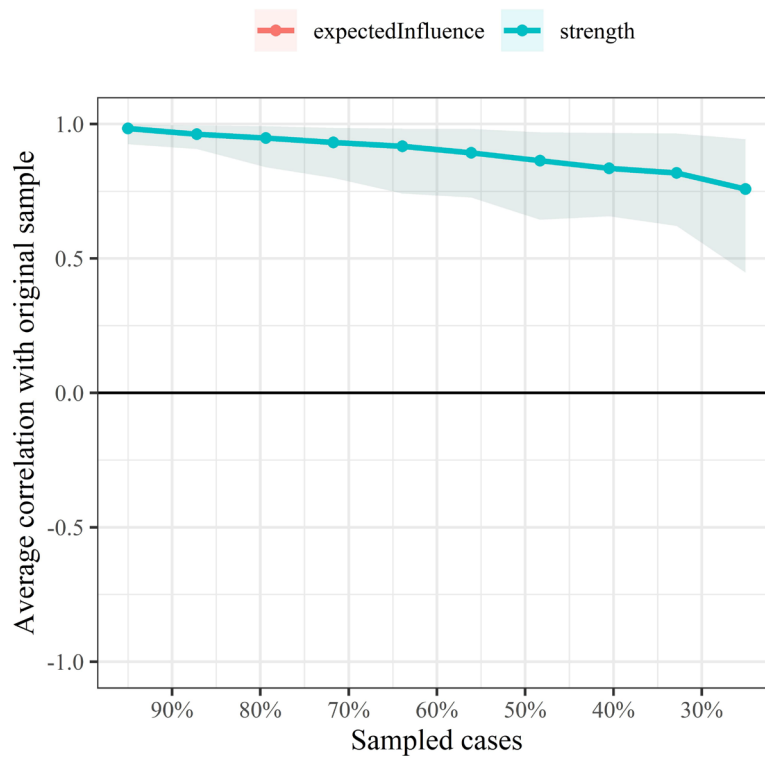

Figure S33. The stability of centrality indices for the network of insomnia with covariates using case-dropping bootstrap.

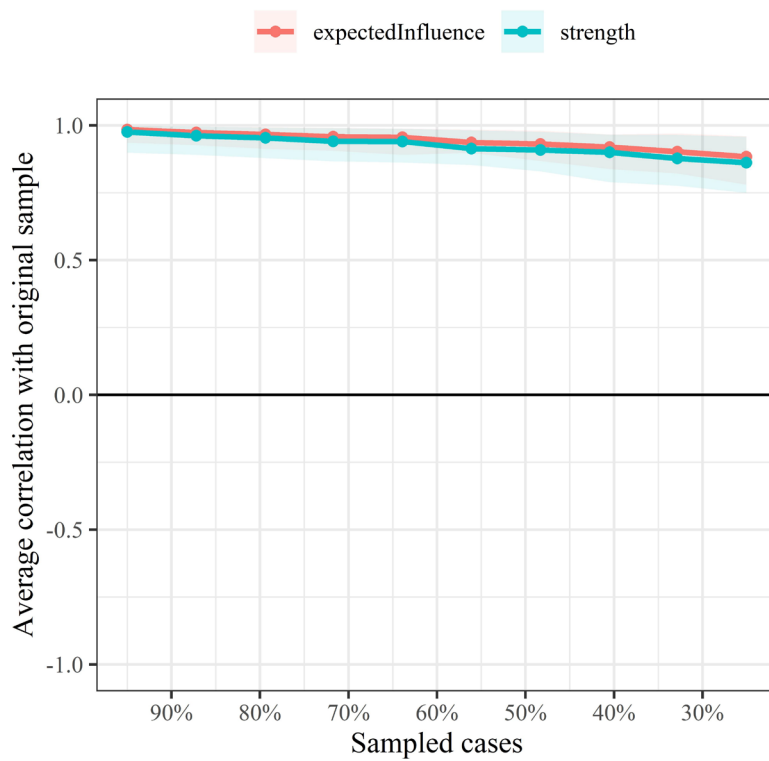

Figure S34. The stability of centrality indices for the network of insomnia and associated personality with covariates using case-dropping bootstrap.

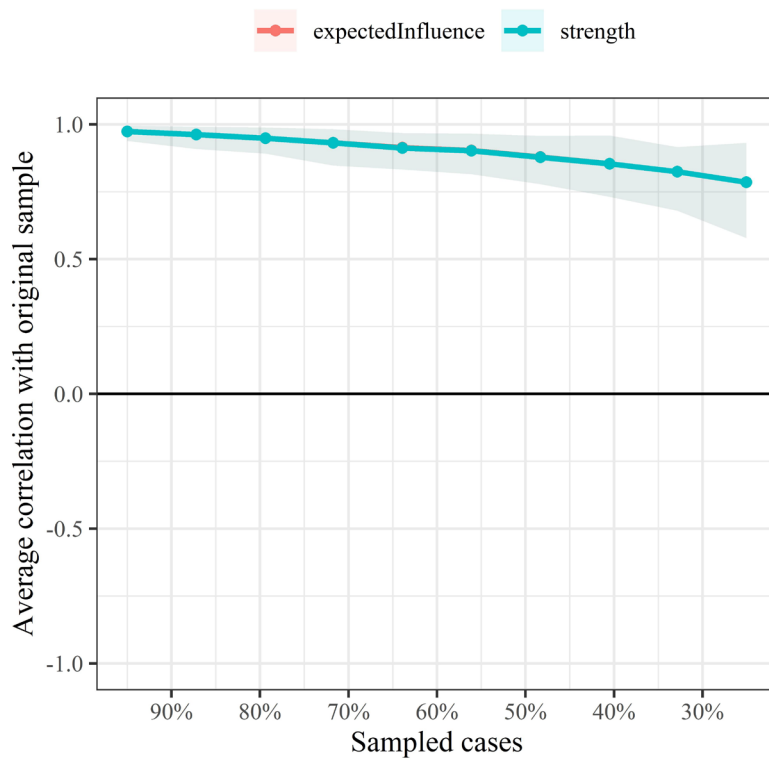

Figure S35. The stability of centrality indices for the network of insomnia and associated interpersonal disturbance with covariates using case-dropping bootstrap.



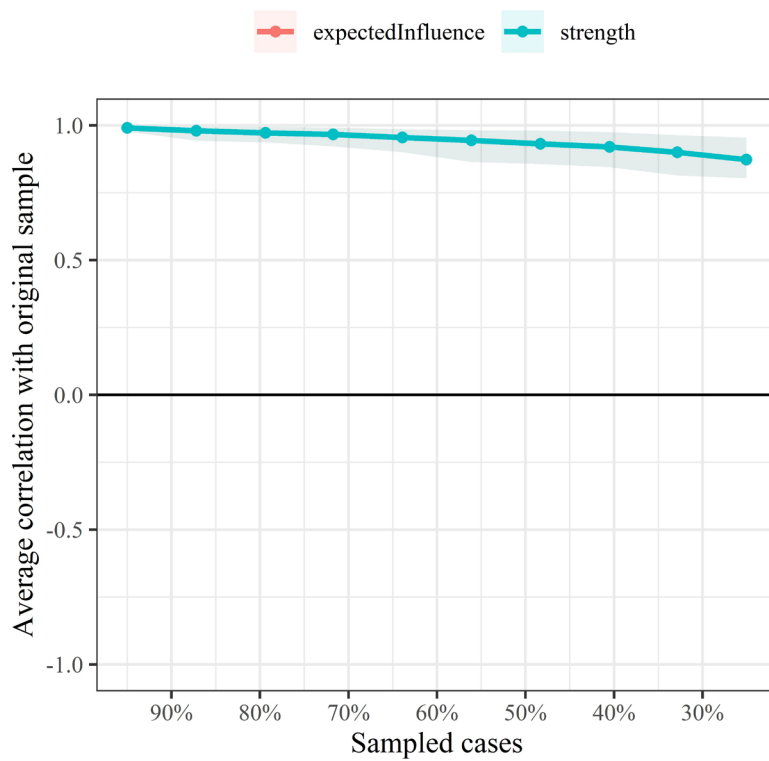

Figure S36. The stability of centrality indices for the network of insomnia and associated childhood trauma with covariates using case-dropping bootstrap.

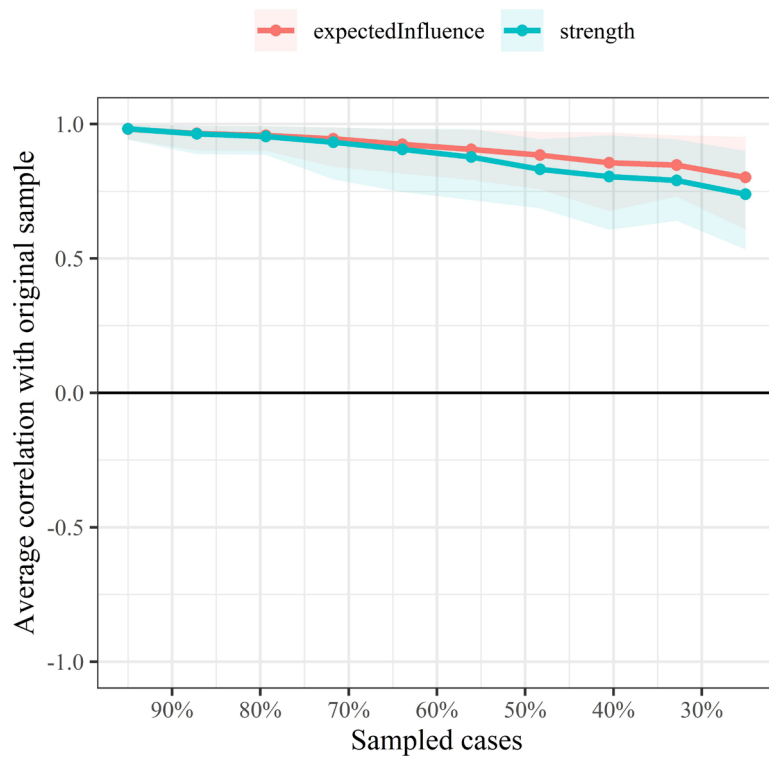

Figure S37. The stability of centrality indices for the network of insomnia and associated social support with covariates using case-dropping bootstrap.

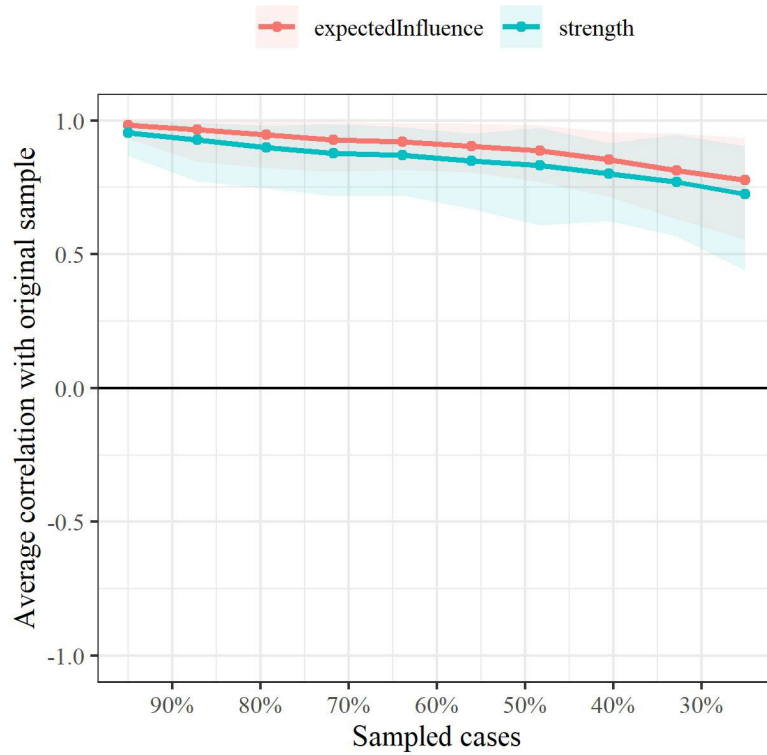

Figure S38. The stability of centrality indices for the network of total ISI score and associated integrated psychosocial factors with covariates using case-dropping bootstrap.

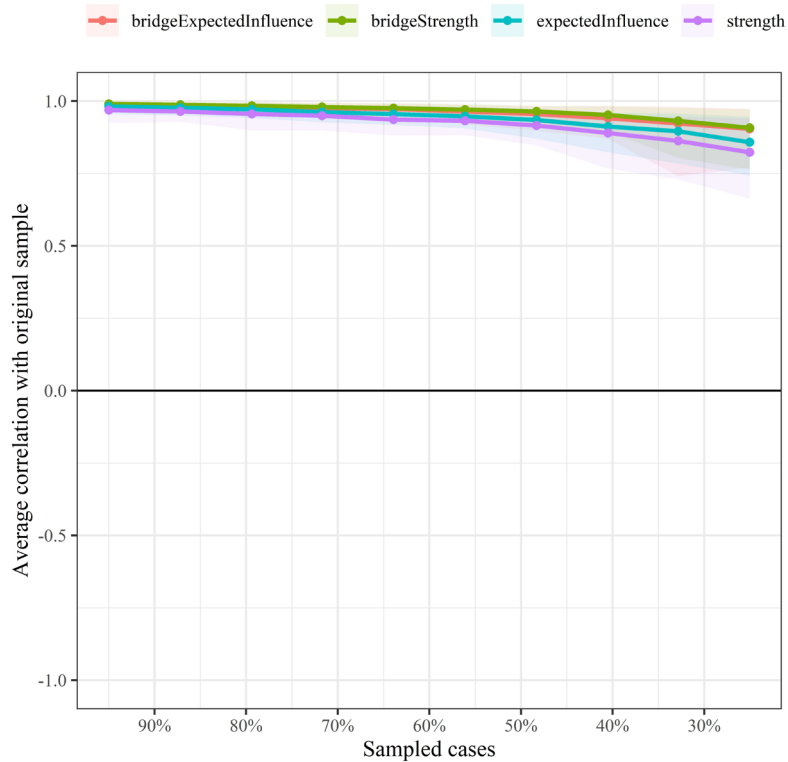

Figure S39. The stability of centrality indices for the network of insomnia symptoms and associated integrated psychosocial factors with covariates using case-dropping bootstrap.

● Bootstrap mean ● Sample

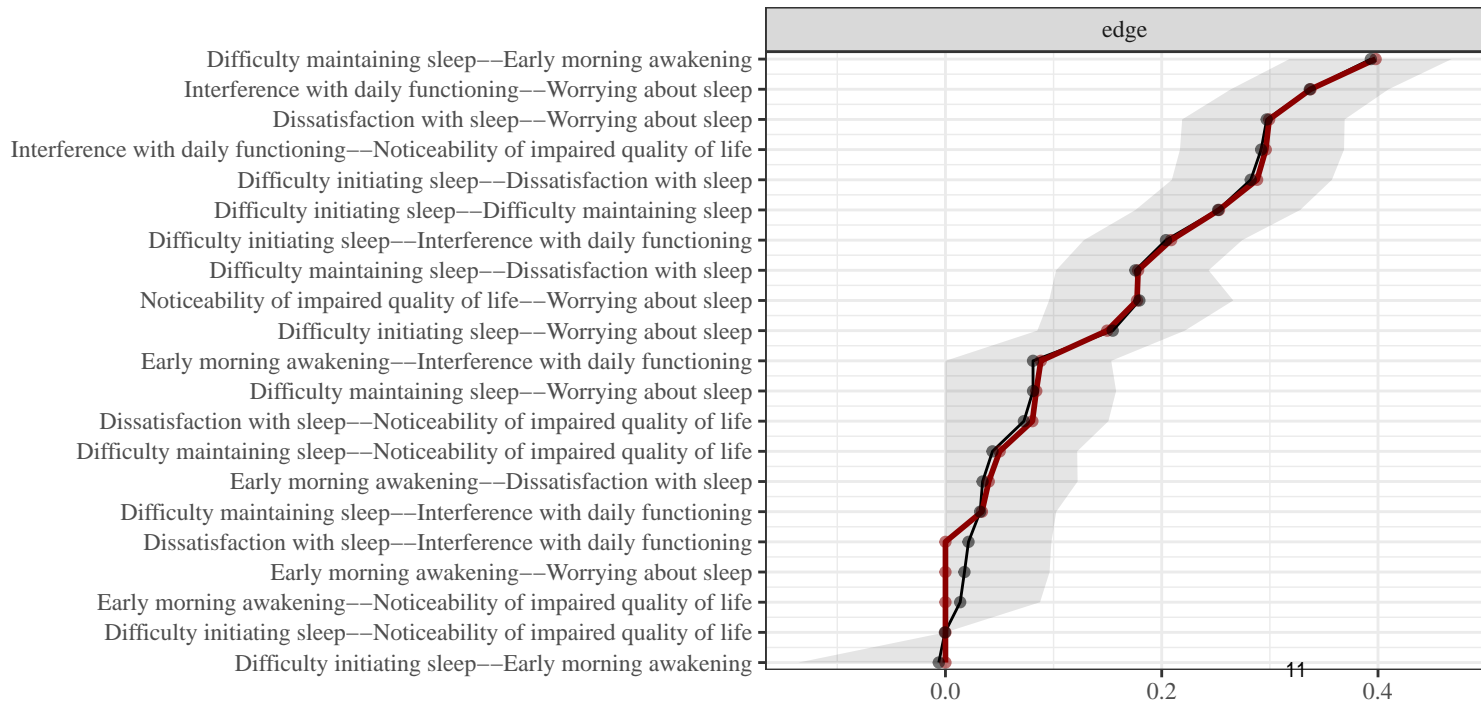

Figure S40. Bootstrapped confidence intervals of estimated edge-weights for the network of insomnia without covariates.

Notes: The gray area represents the bootstrapped confidence intervals (CIs). The vertical axis represents the edges between each pair of nodes while the horizontal axis represents the edge weight.

● Bootstrap mean ● Sample

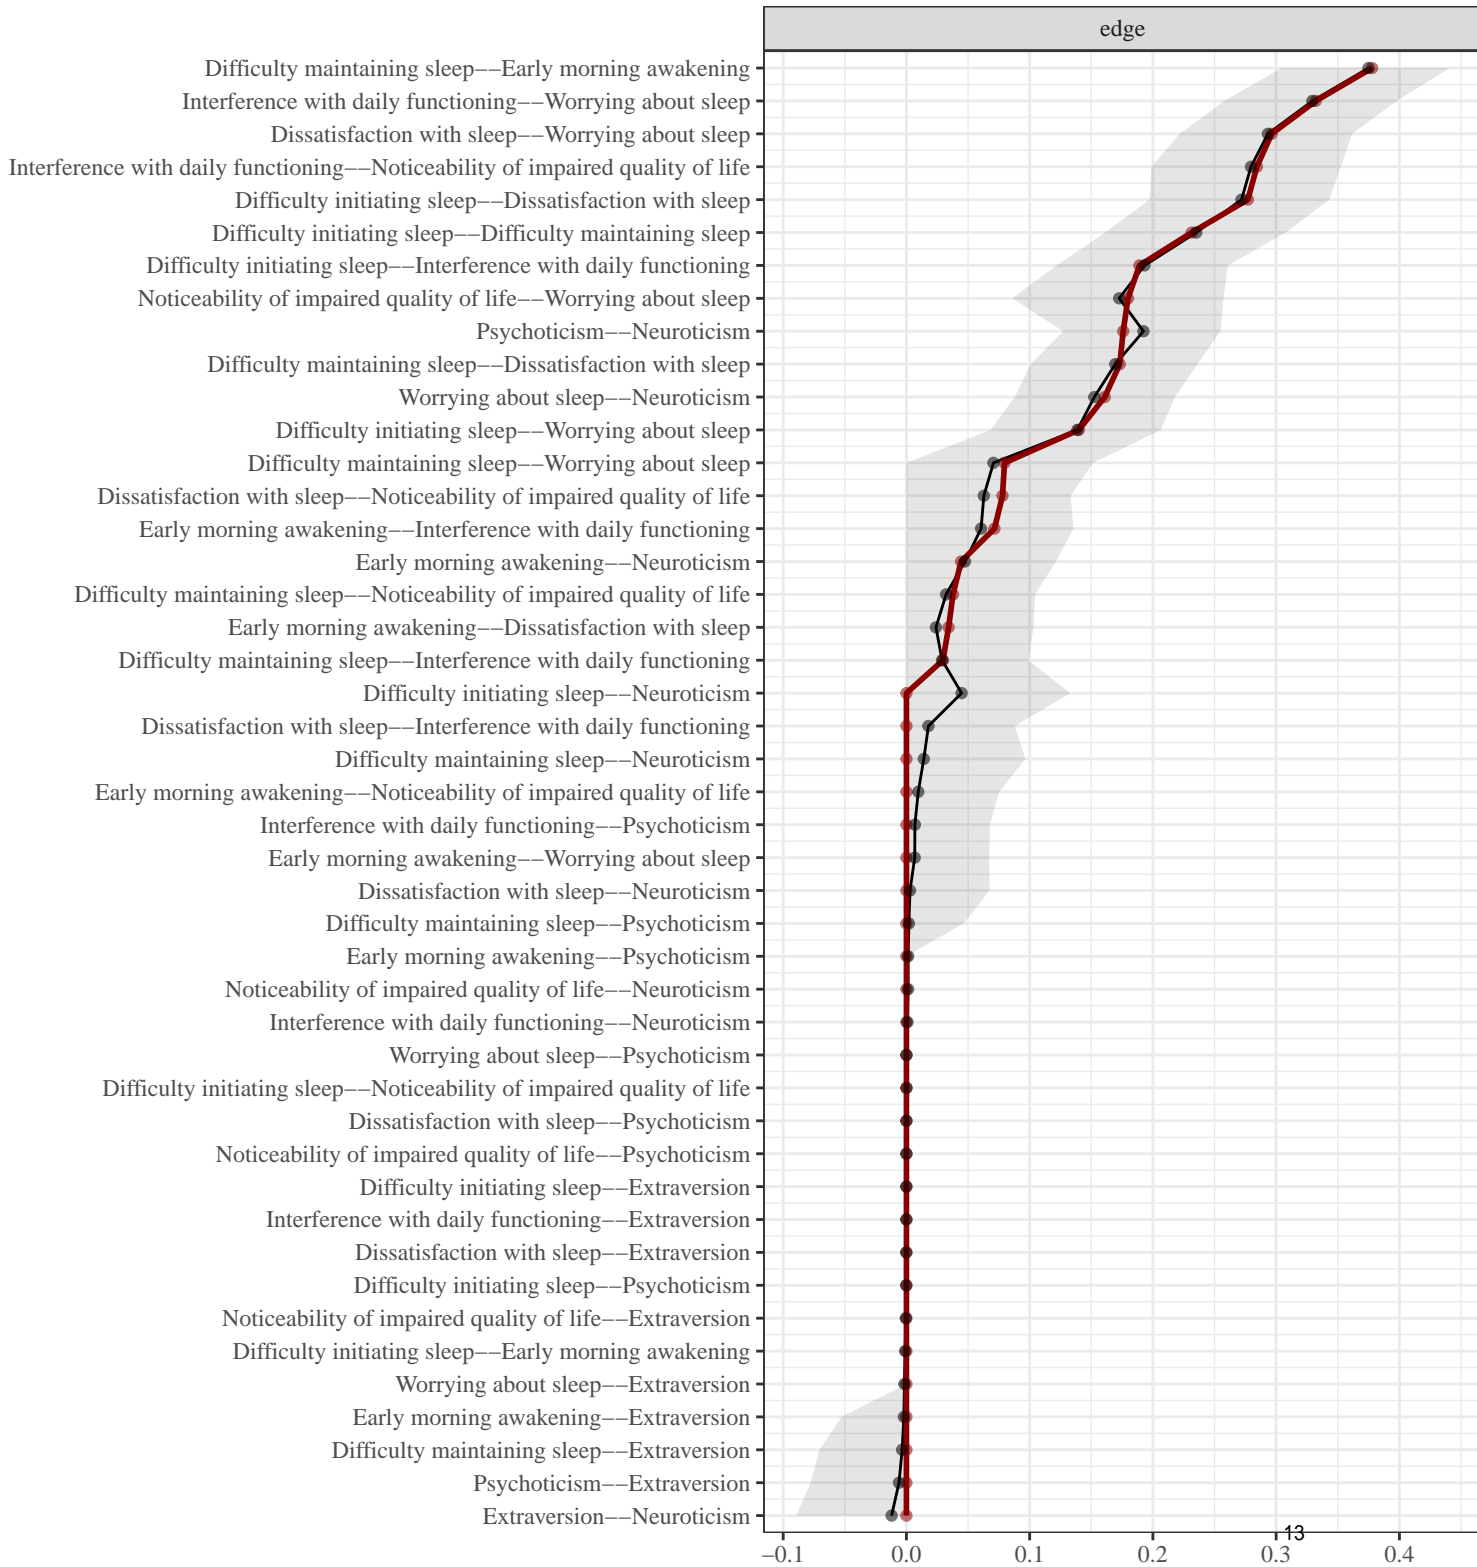

Figure S41. Bootstrapped confidence intervals of estimated edge-weights for the network of insomnia and associated personality without covariates.

Notes: The gray area represents the bootstrapped confidence intervals (CIs). The vertical axis represents the edges between each pair of nodes while the horizontal axis represents the edge weight.

● Bootstrap mean ● Sample

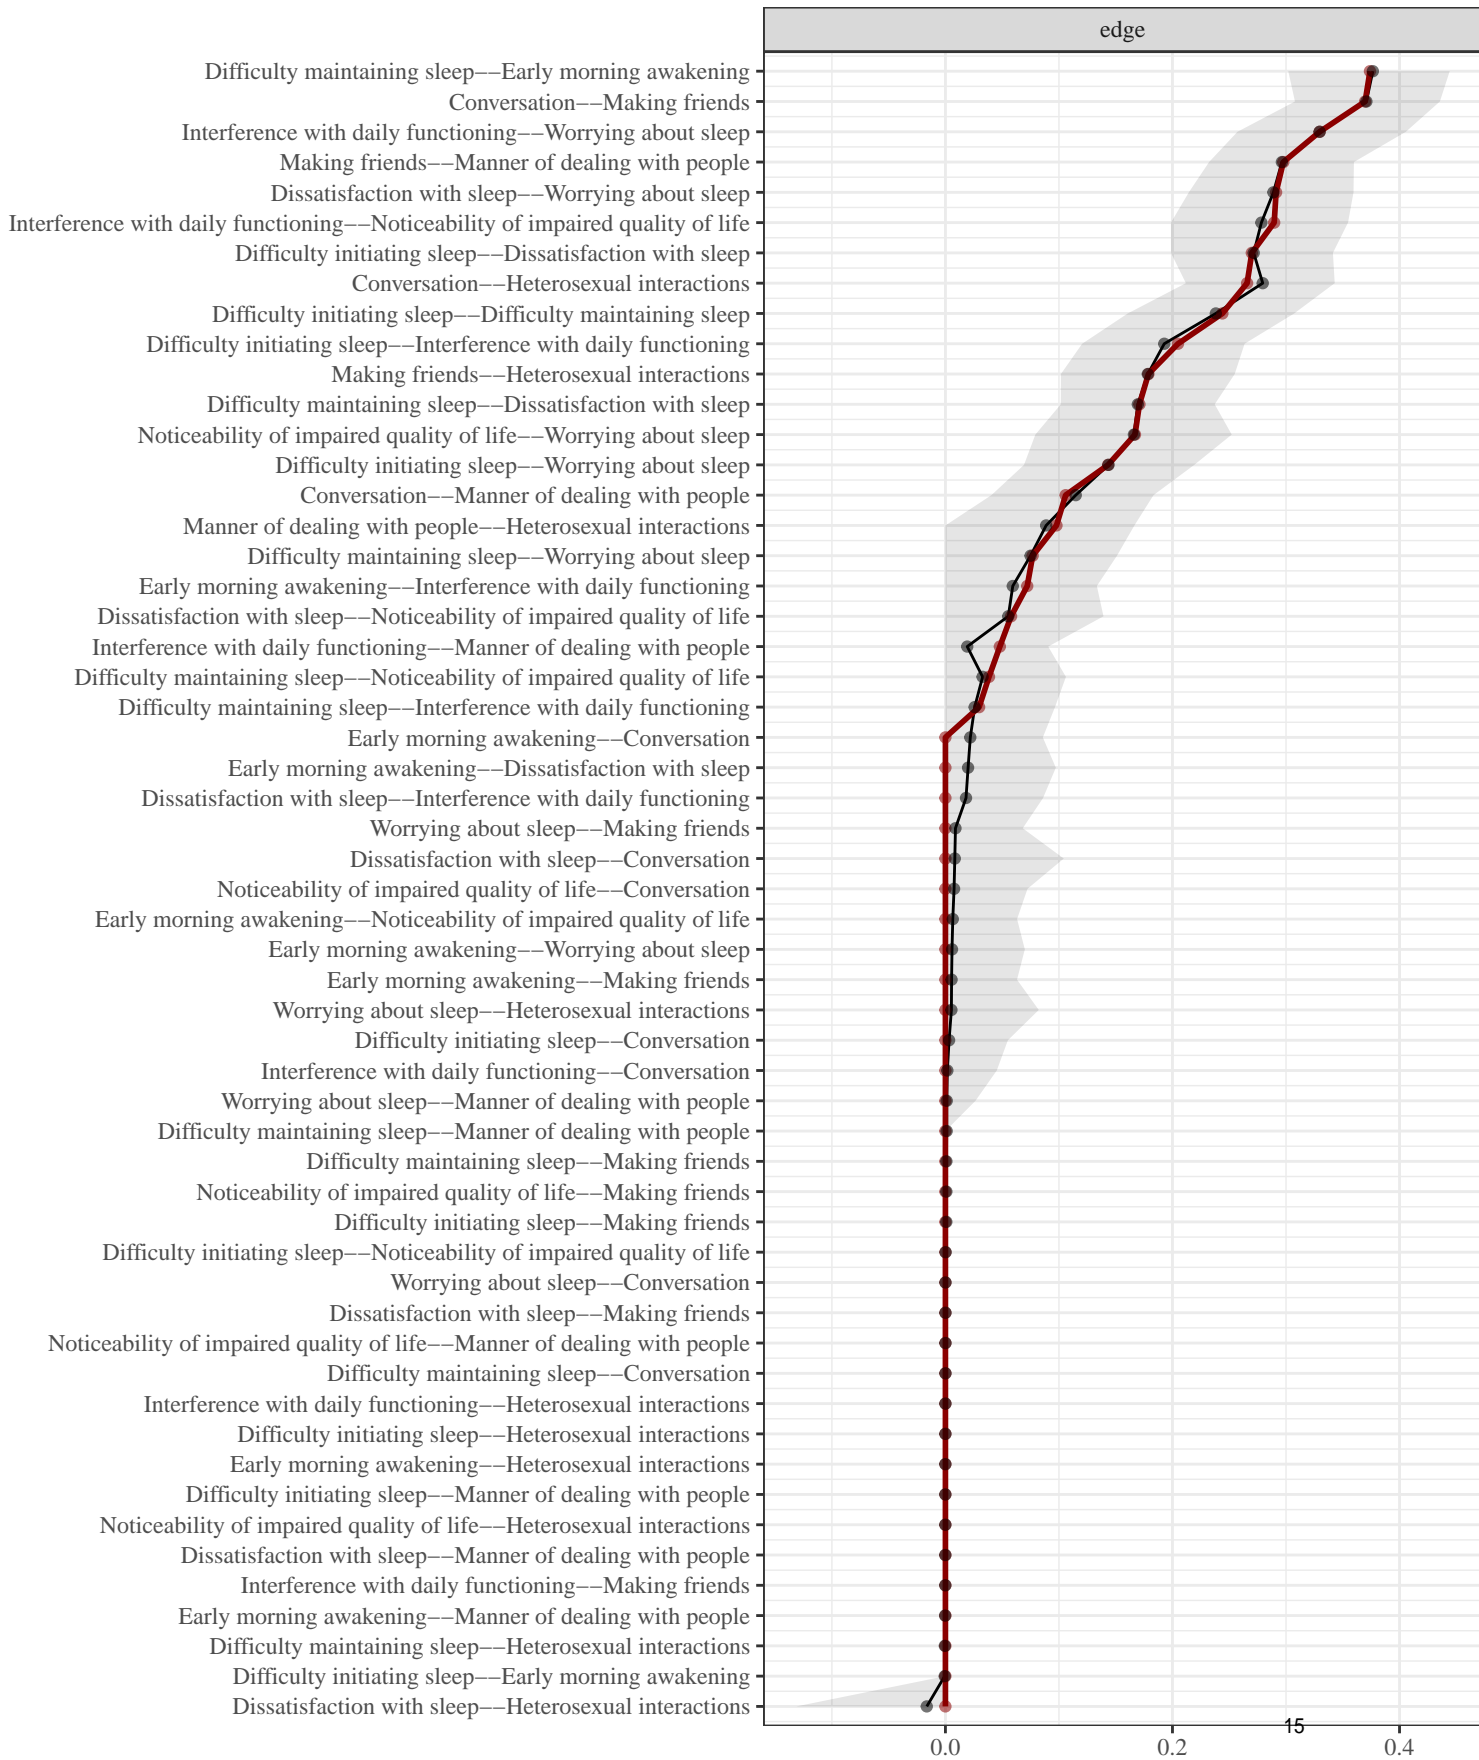

Figure S42. Bootstrapped confidence intervals of estimated edge-weights for the network of insomnia and associated interpersonal disturbance without covariates.

Notes: The gray area represents the bootstrapped confidence intervals (CIs). The vertical axis represents the edges between each pair of nodes while the horizontal axis represents the edge weight.



● Bootstrap mean ● Sample

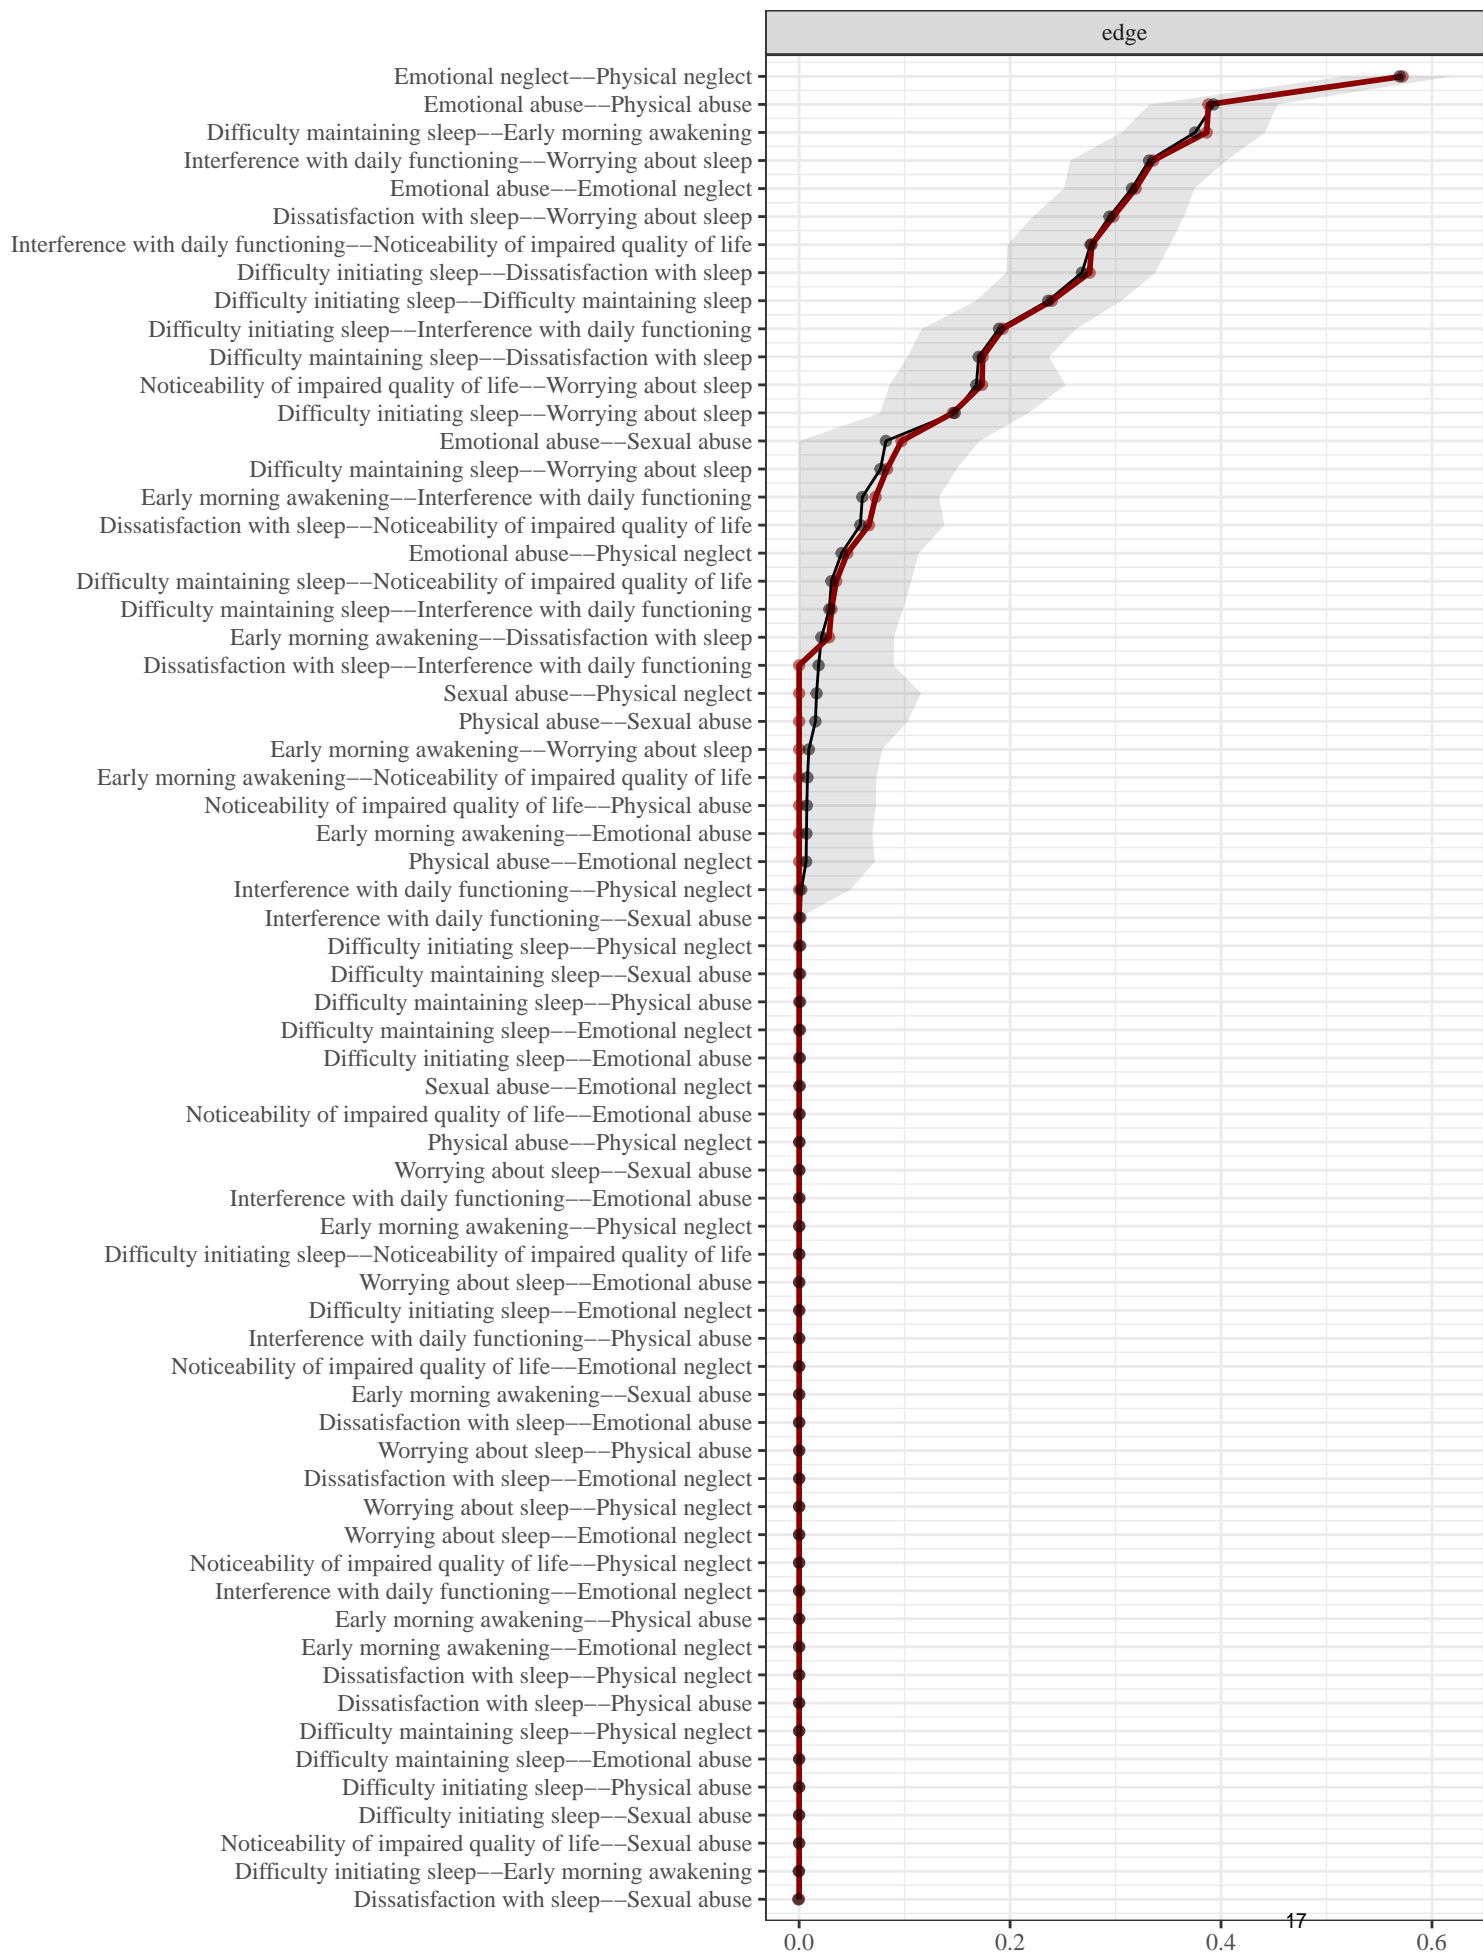

Figure S43. Bootstrapped confidence intervals of estimated edge-weights for the network of insomnia and associated childhood trauma without covariates.

Notes: The gray area represents the bootstrapped confidence intervals (CIs). The vertical axis represents the edges between each pair of nodes while the horizontal axis represents the edge weight.

● Bootstrap mean ● Sample

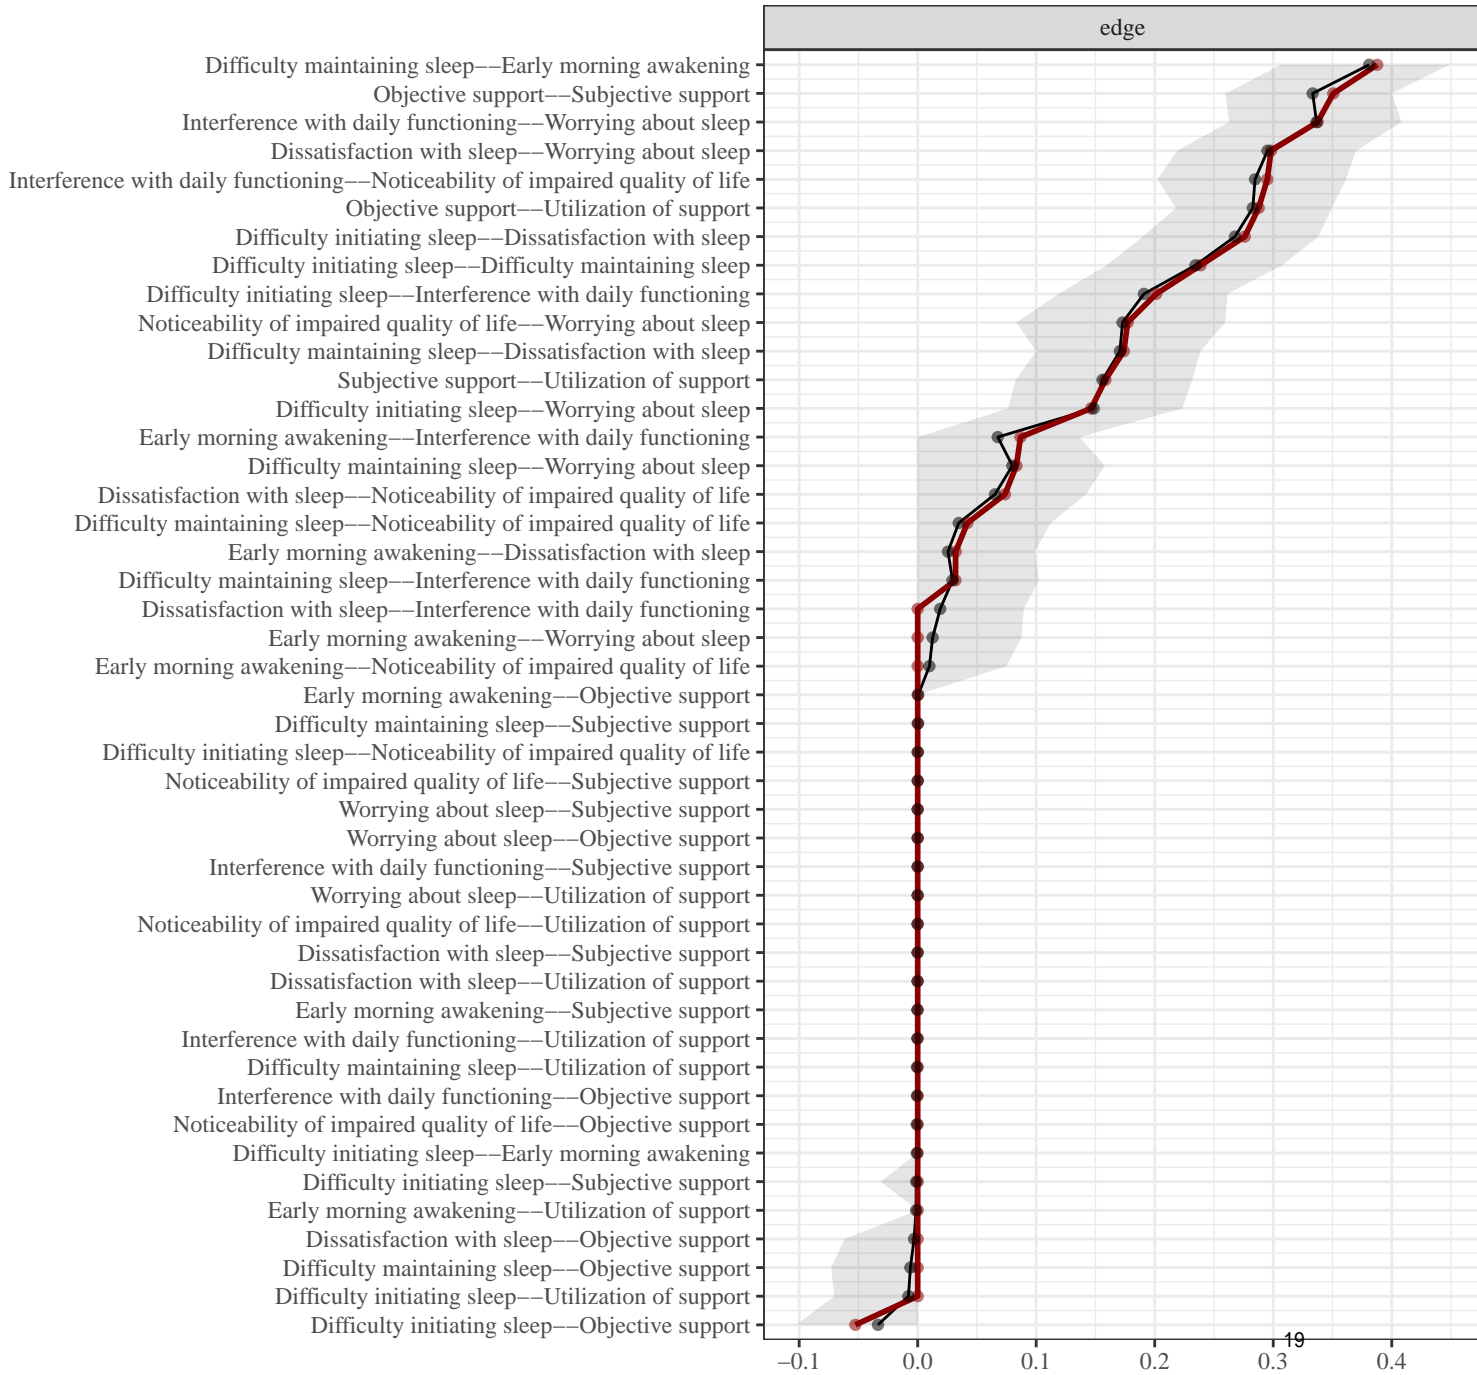

Figure S44. Bootstrapped confidence intervals of estimated edge-weights for the network of insomnia and associated social support without covariates.

Notes: The gray area represents the bootstrapped confidence intervals (CIs). The vertical axis represents the edges between each pair of nodes while the horizontal axis represents the edge weight.

● Bootstrap mean ● Sample

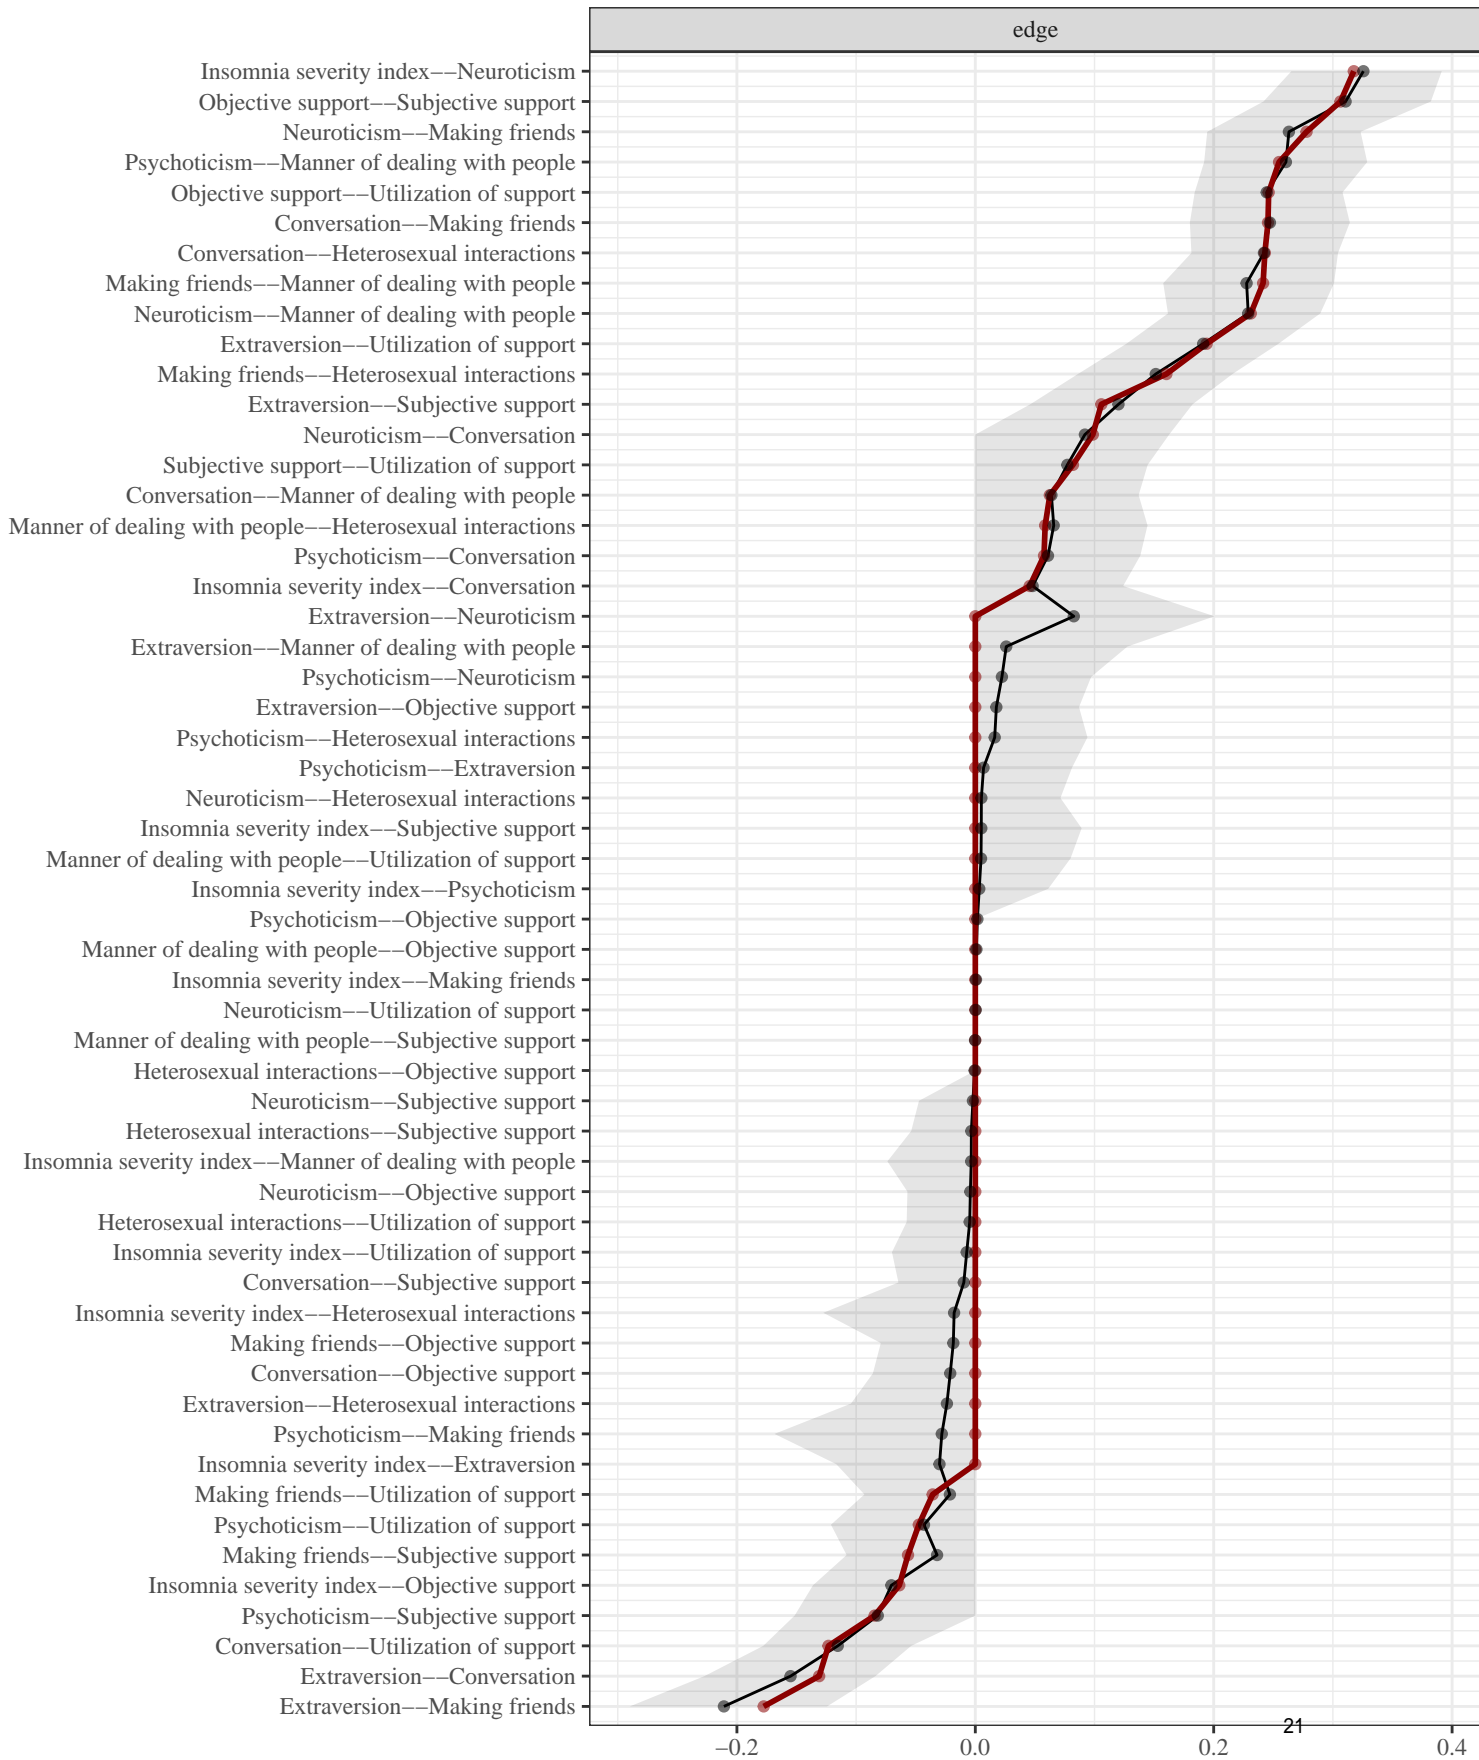

Figure S45. Bootstrapped confidence intervals of estimated edge-weights for the network of total ISI score and associated integrated psychosocial factors without covariates.

Notes: The gray area represents the bootstrapped confidence intervals (CIs). The vertical axis represents the edges between each pair of nodes while the horizontal axis represents the edge weight.

● Bootstrap mean ● Sample

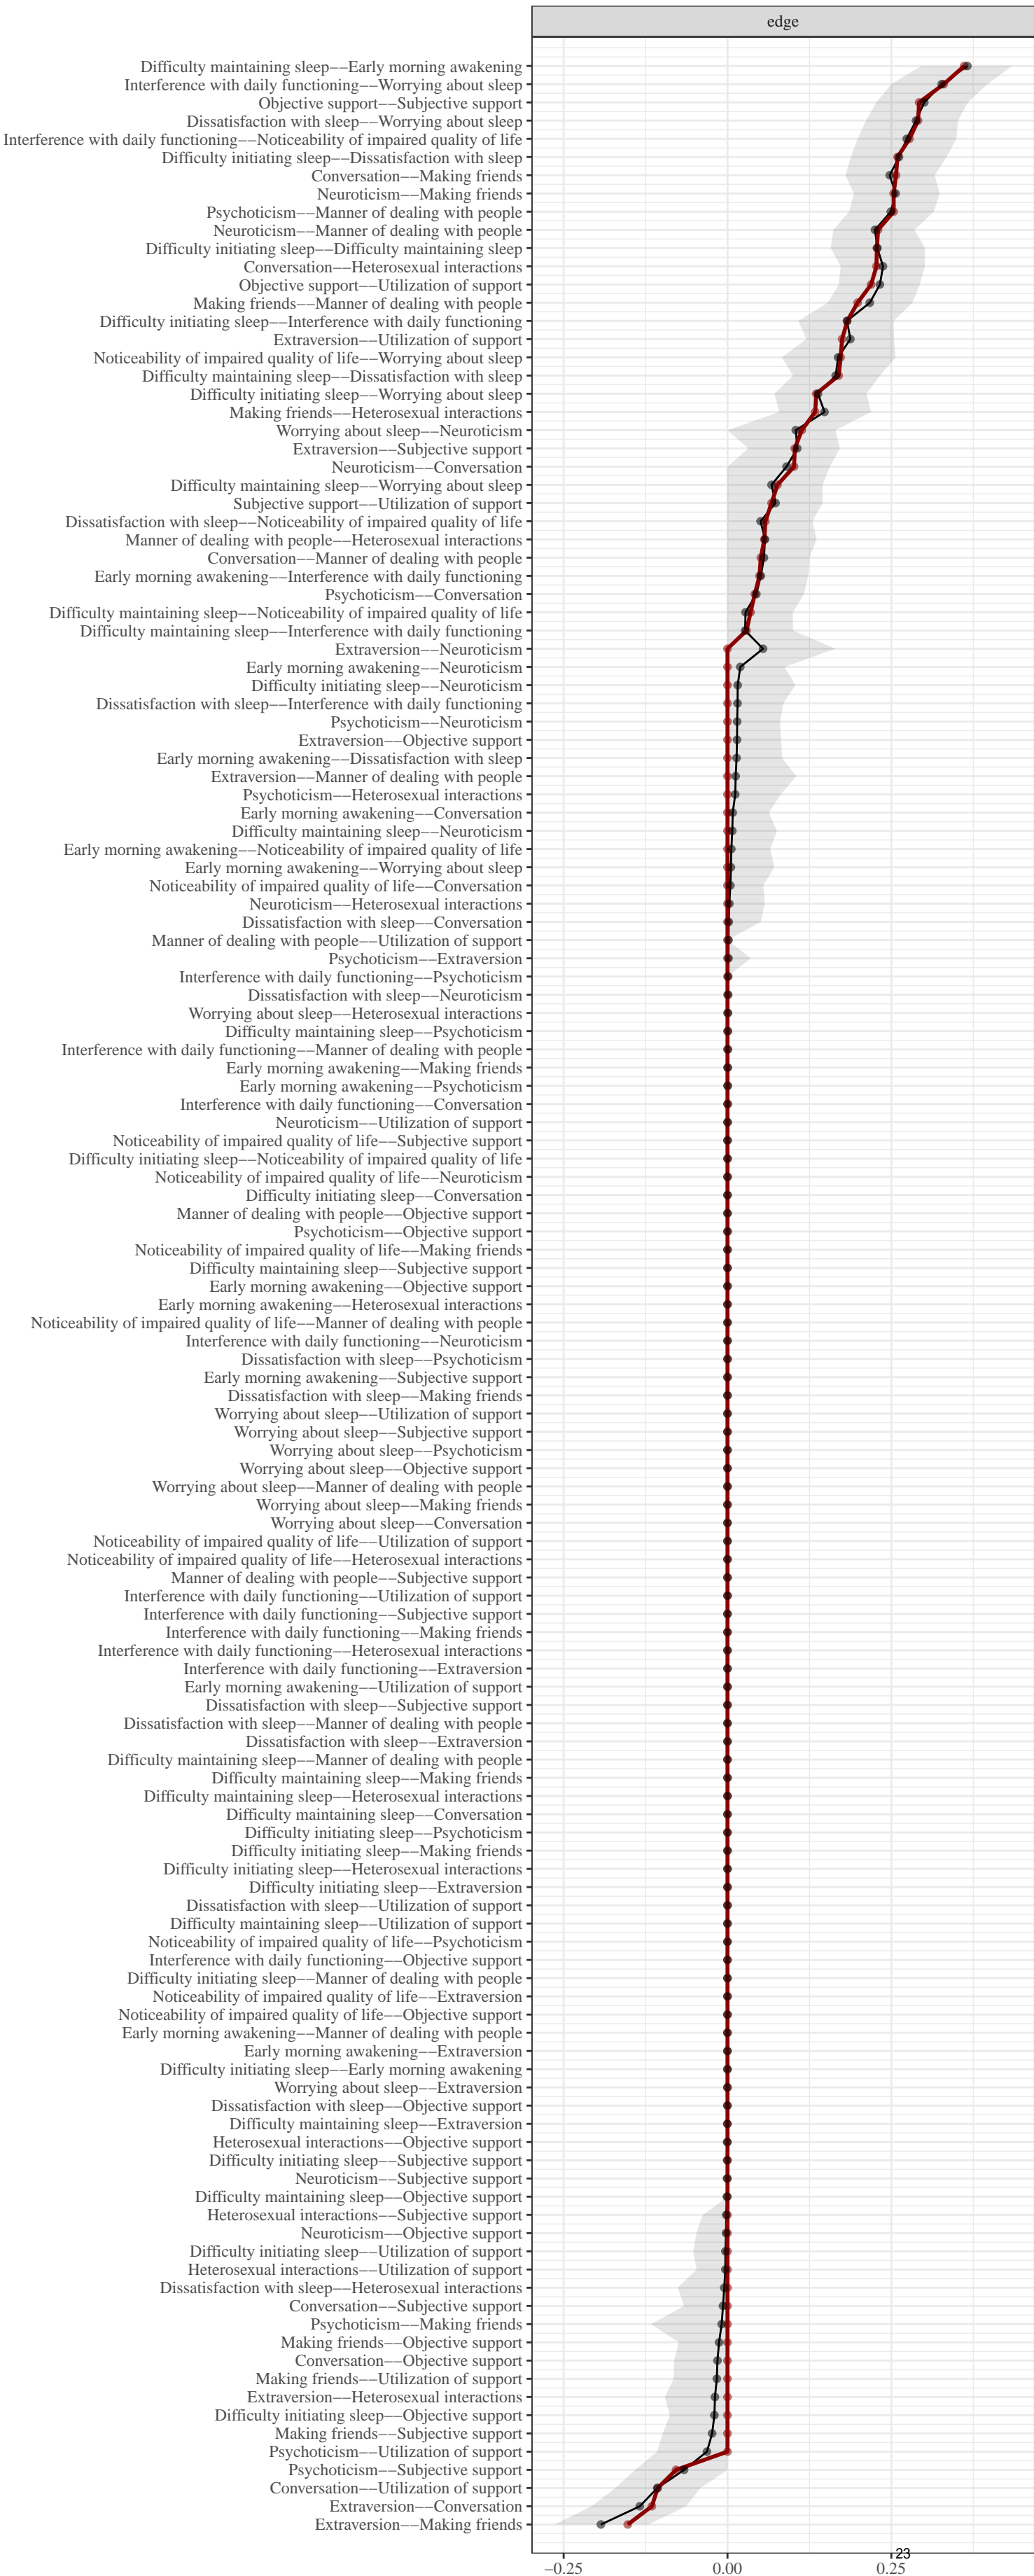

Figure S46. Bootstrapped confidence intervals of estimated edge-weights for the network of insomnia symptoms and associated integrated psychosocial factors without covariates.

Notes: The gray area represents the bootstrapped confidence intervals (CIs). The vertical axis represents the edges between each pair of nodes while the horizontal axis represents the edge weight.



● Bootstrap mean ● Sample

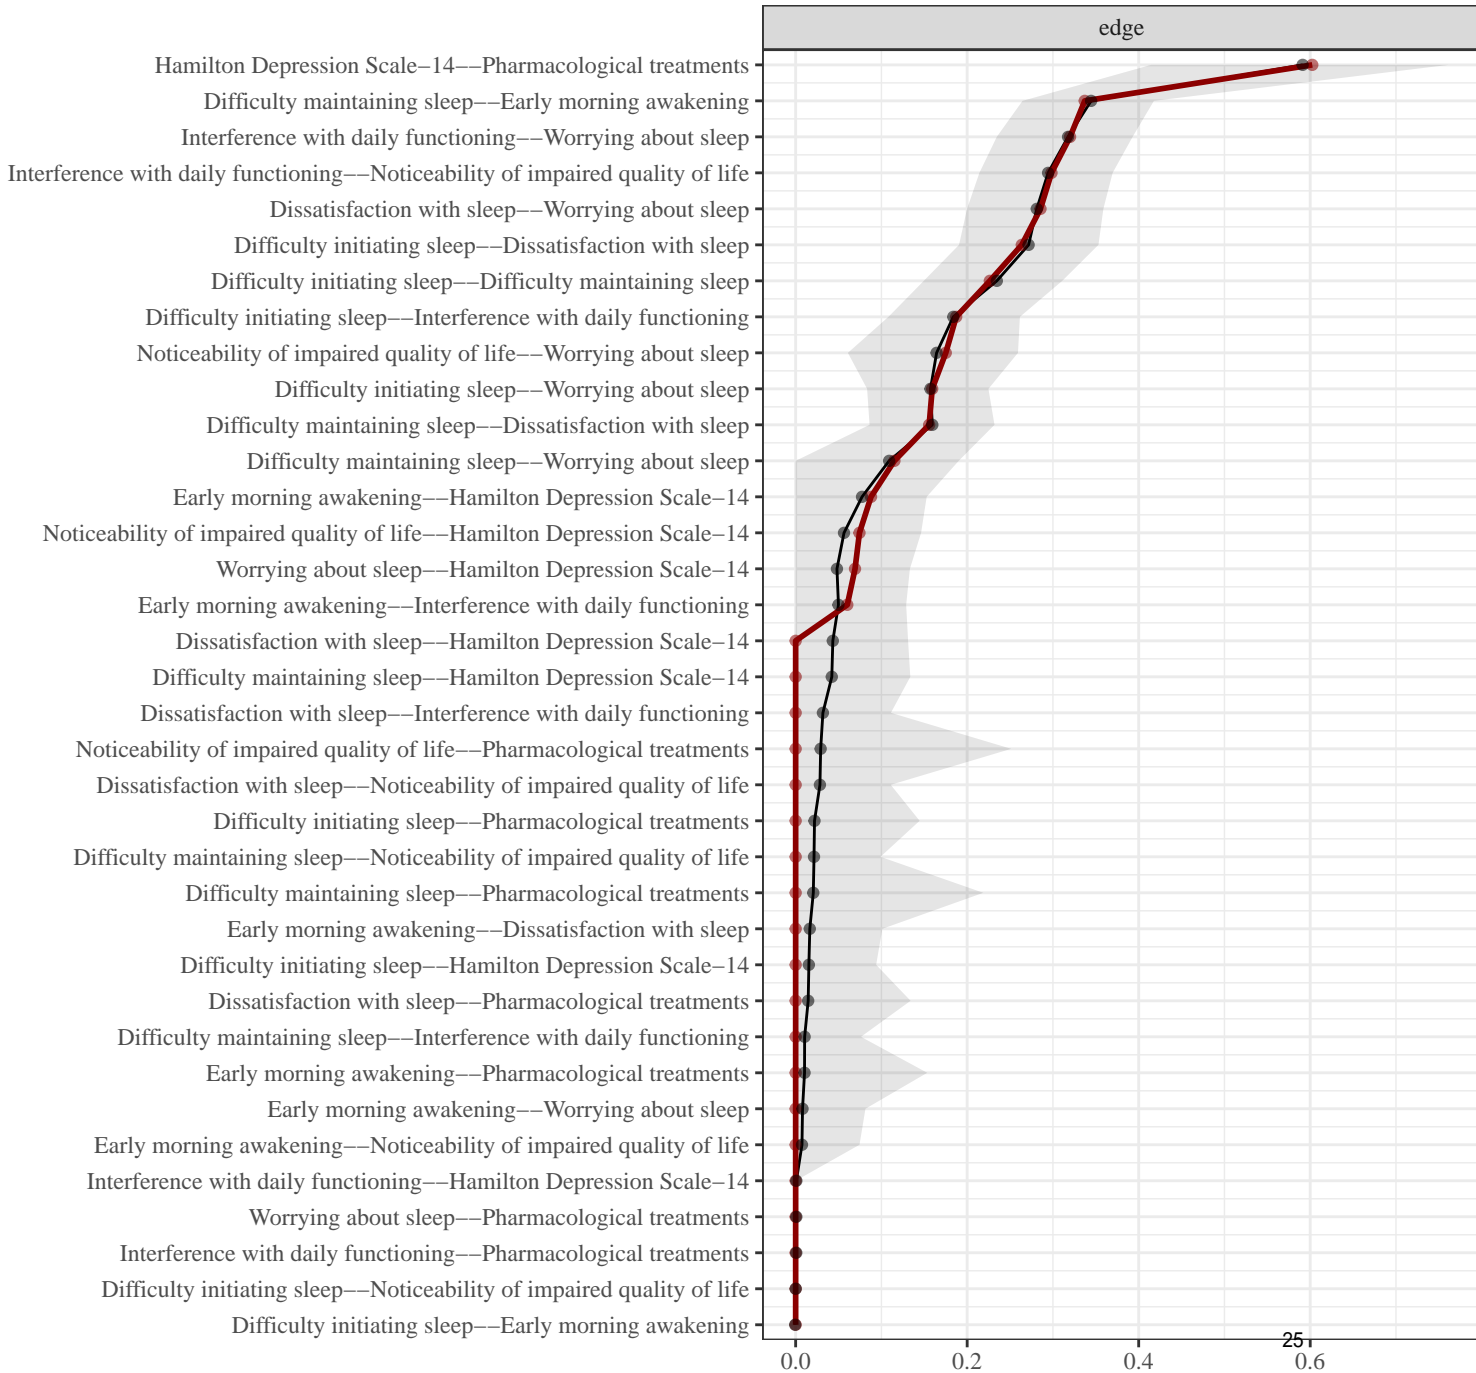

Figure S47. Bootstrapped confidence intervals of estimated edge-weights for the network of insomnia with covariates.

Notes: The gray area represents the bootstrapped confidence intervals (CIs). The vertical axis represents the edges between each pair of nodes while the horizontal axis represents the edge weight.

● Bootstrap mean ● Sample

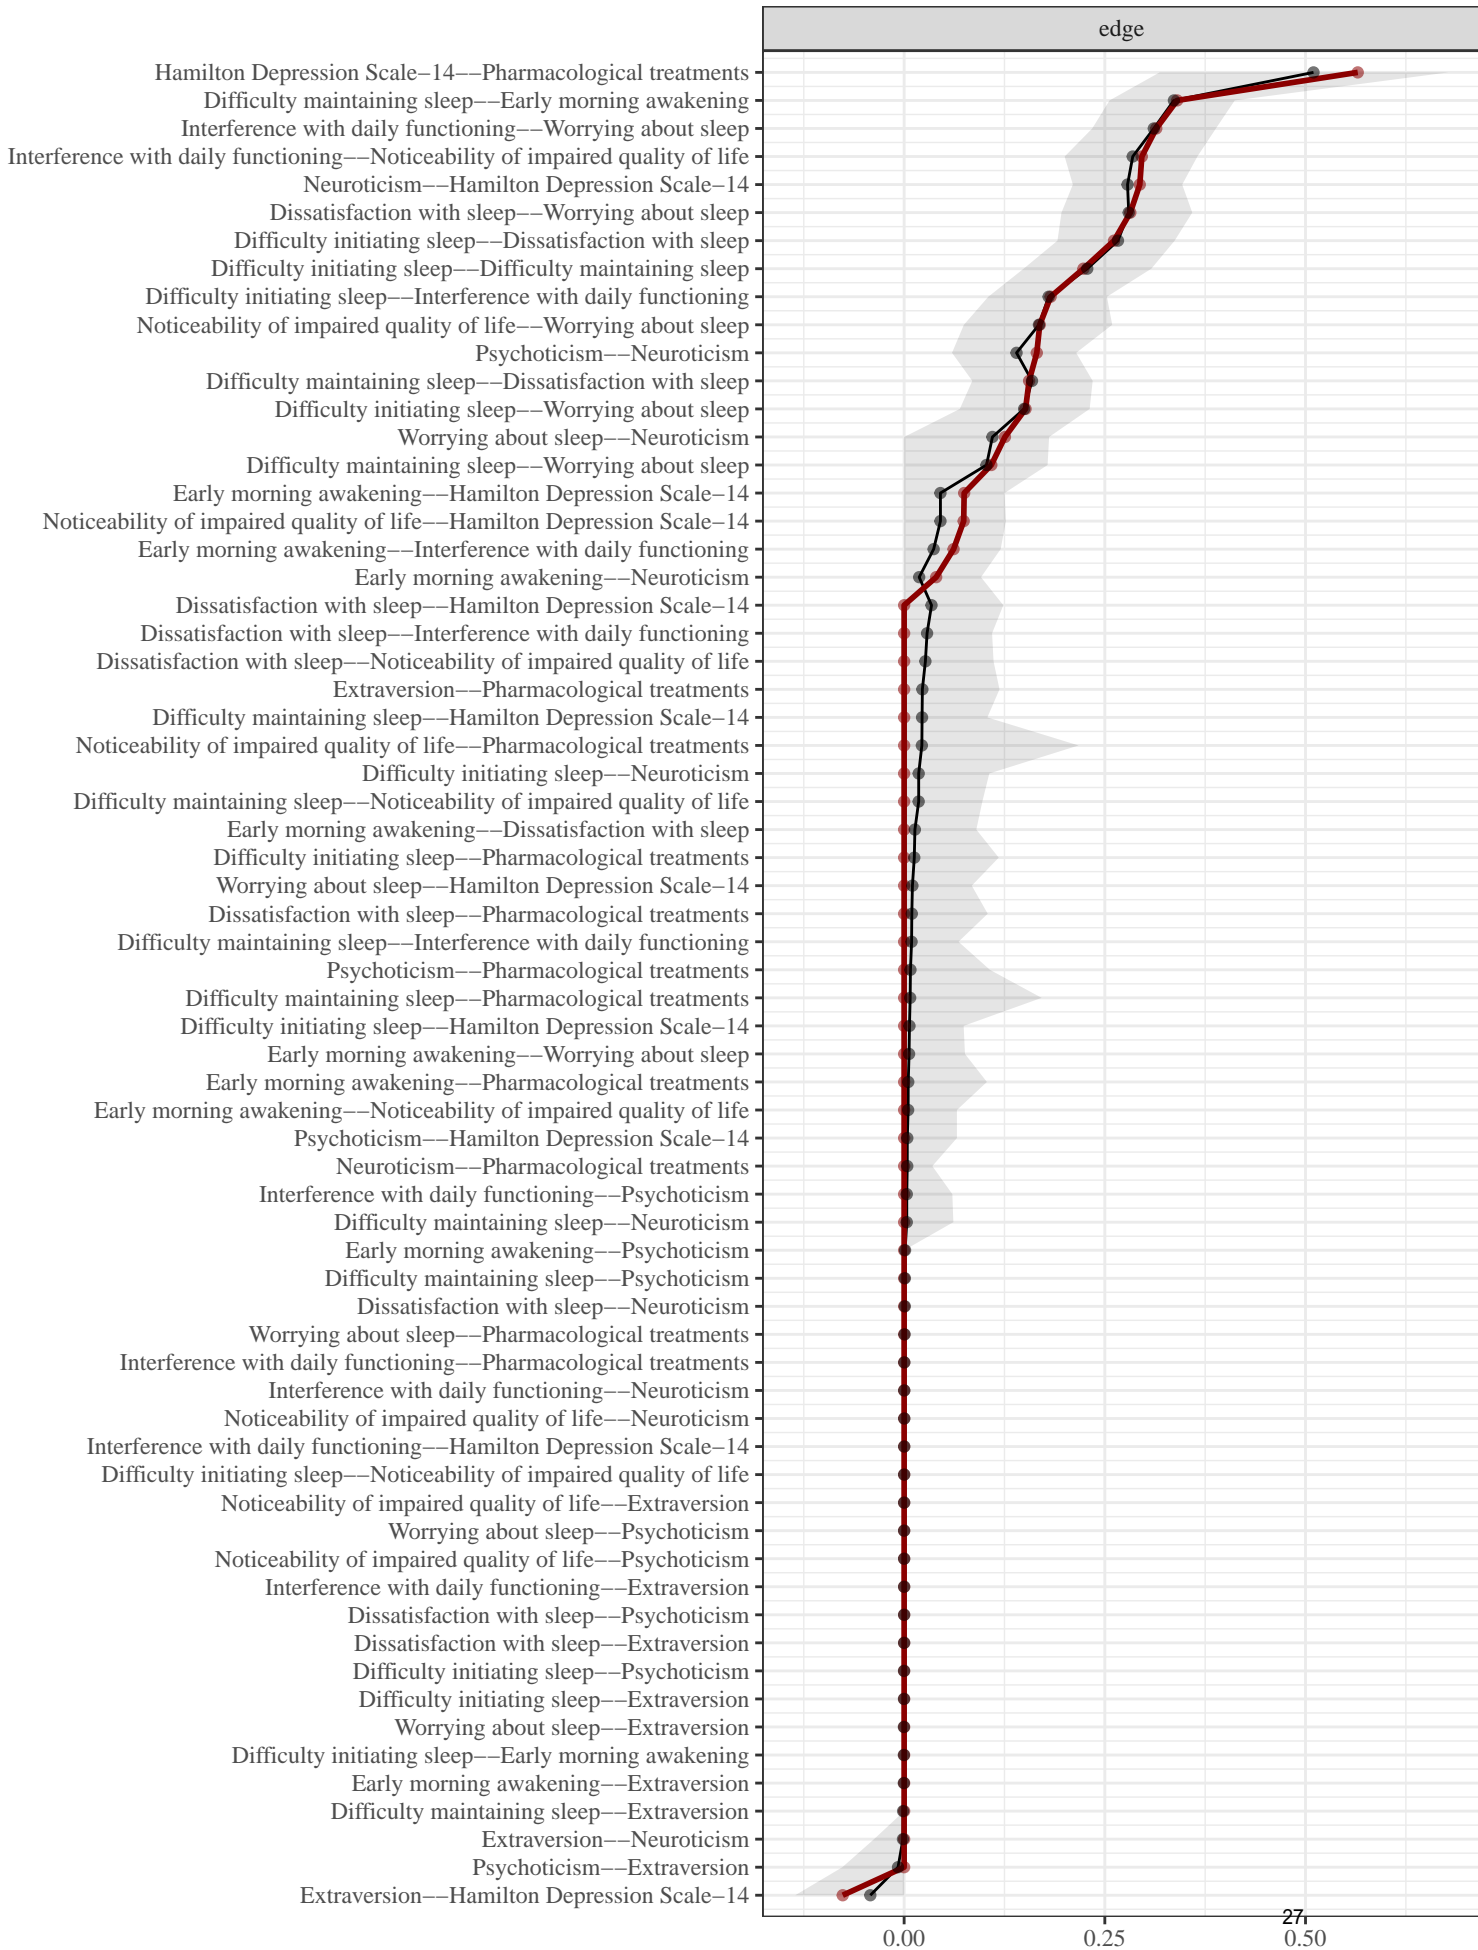

Figure S48. Bootstrapped confidence intervals of estimated edge-weights for the network of insomnia and associated personality with covariates.

Notes: The gray area represents the bootstrapped confidence intervals (CIs). The vertical axis represents the edges between each pair of nodes while the horizontal axis represents the edge weight.

● Bootstrap mean ● Sample

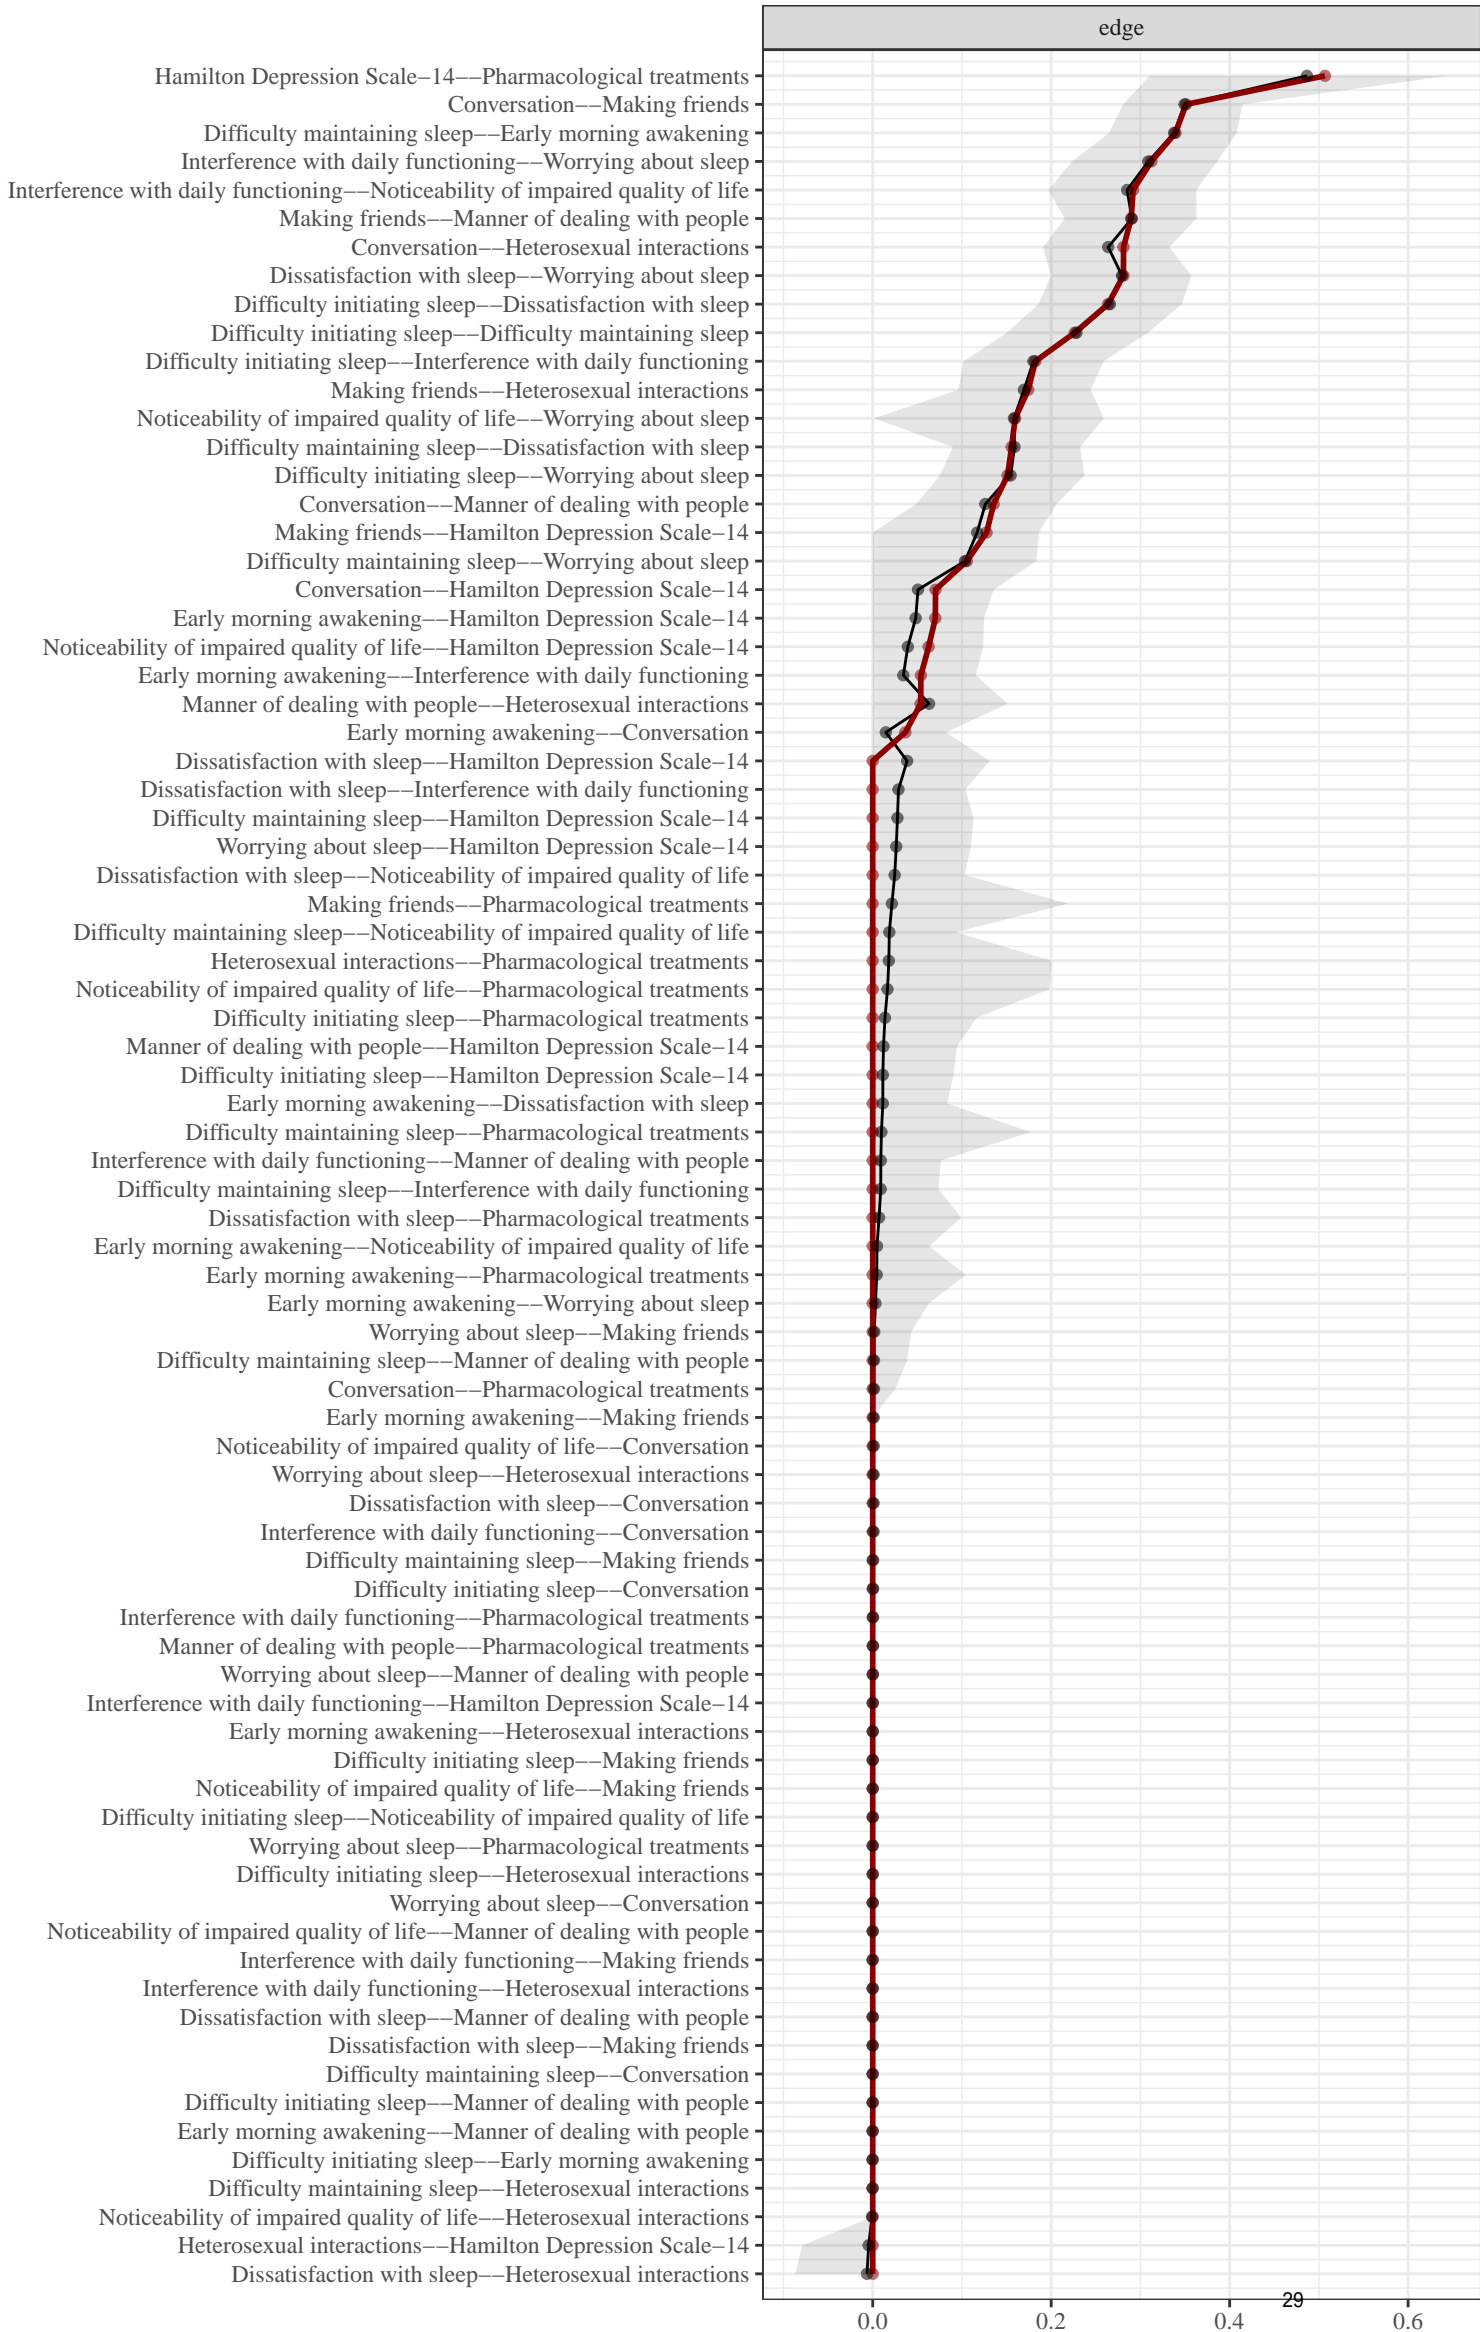

Figure S49. Bootstrapped confidence intervals of estimated edge-weights for the network of insomnia and associated interpersonal disturbance with covariates.

Notes: The gray area represents the bootstrapped confidence intervals (CIs). The vertical axis represents the edges between each pair of nodes while the horizontal axis represents the edge weight.

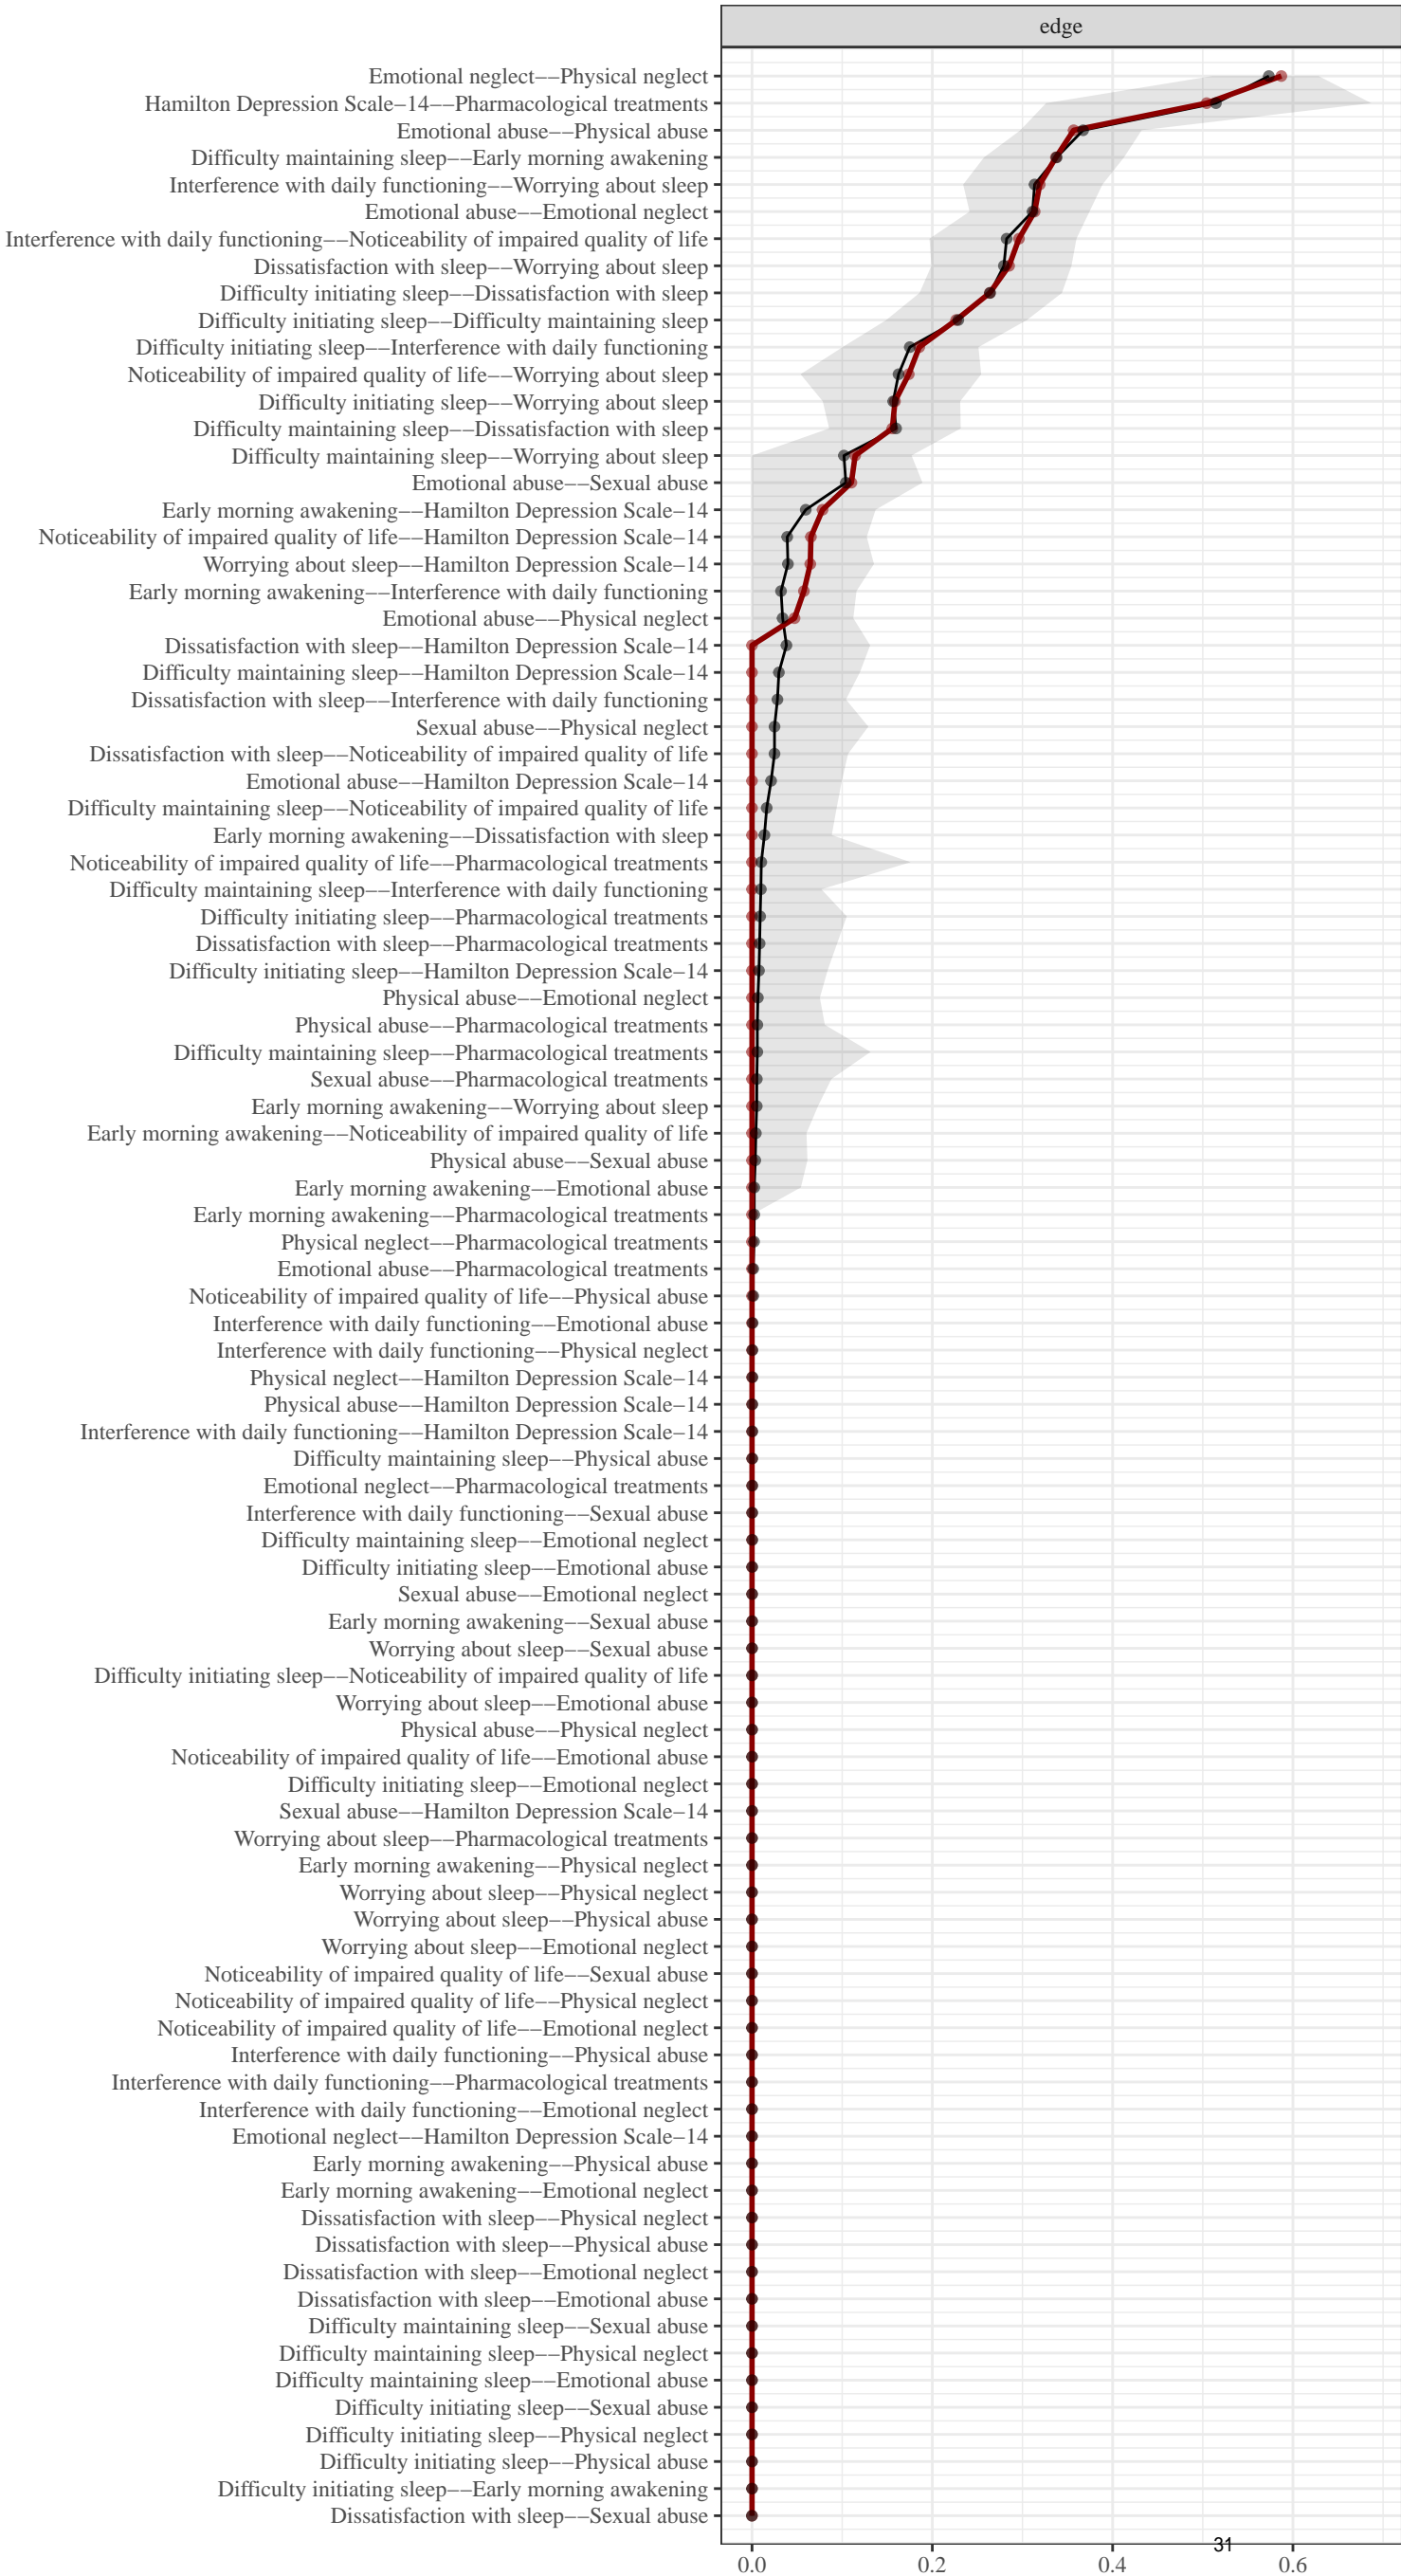

Figure S50. Bootstrapped confidence intervals of estimated edge-weights for the network of insomnia and associated childhood trauma with covariates.

Notes: The gray area represents the bootstrapped confidence intervals (CIs). The vertical axis represents the edges between each pair of nodes while the horizontal axis represents the edge weight.



● Bootstrap mean ● Sample

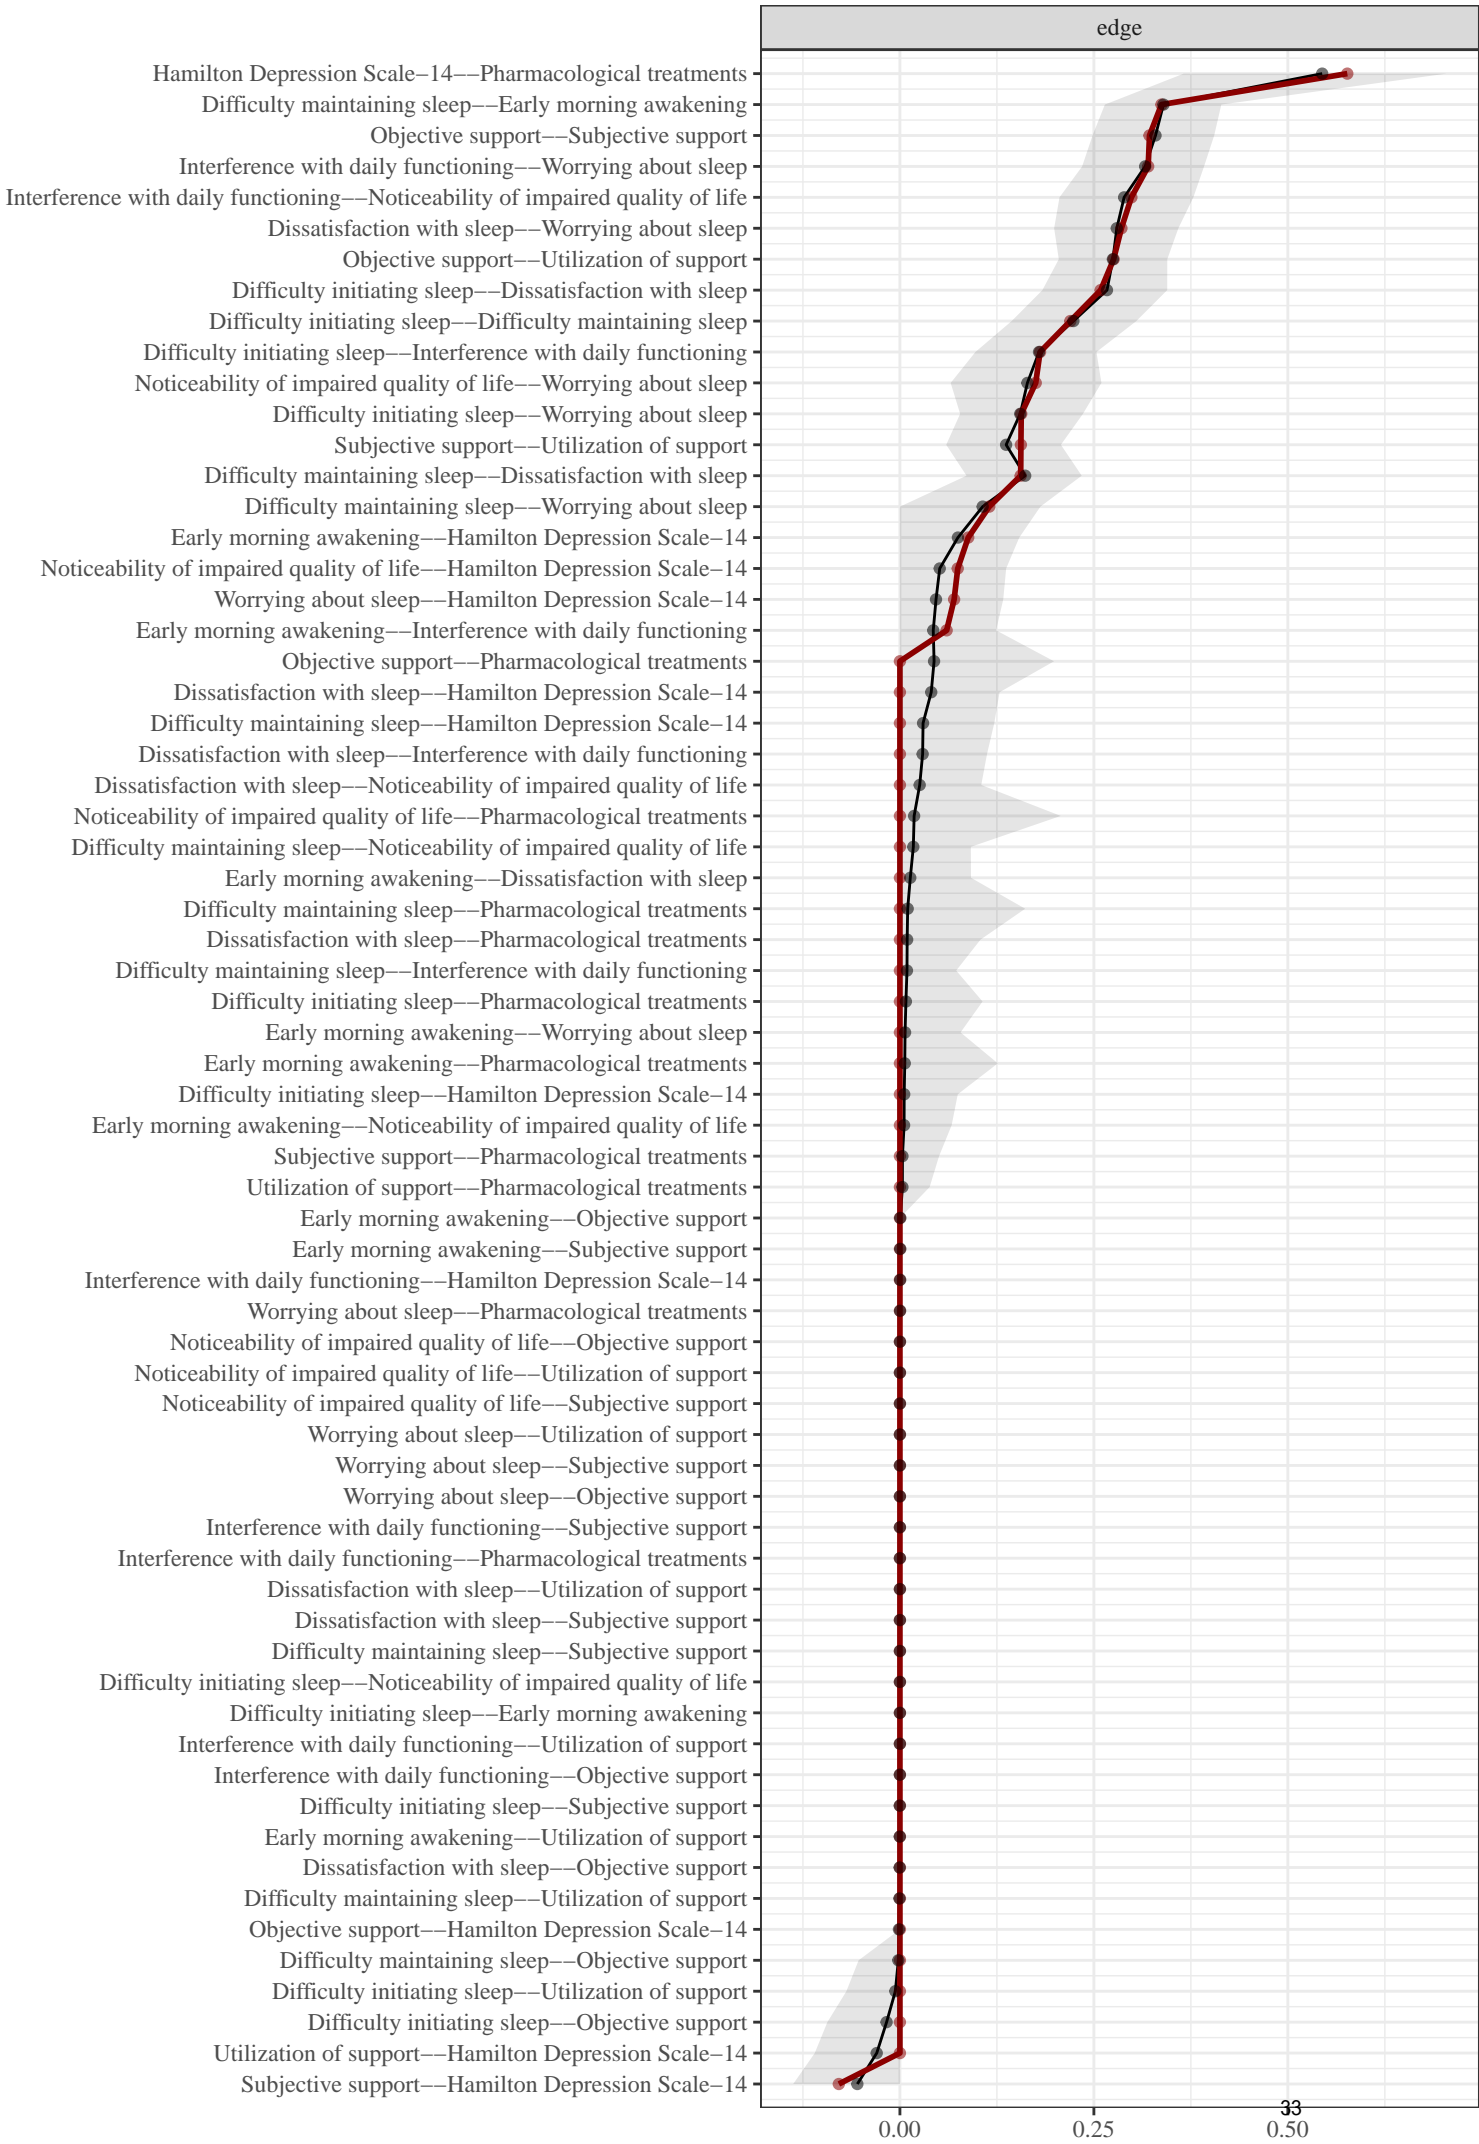

Figure S51. Bootstrapped confidence intervals of estimated edge-weights for the network of insomnia and associated social support with covariates.

Notes: The gray area represents the bootstrapped confidence intervals (CIs). The vertical axis represents the edges between each pair of nodes while the horizontal axis represents the edge weight.

● Bootstrap mean ● Sample

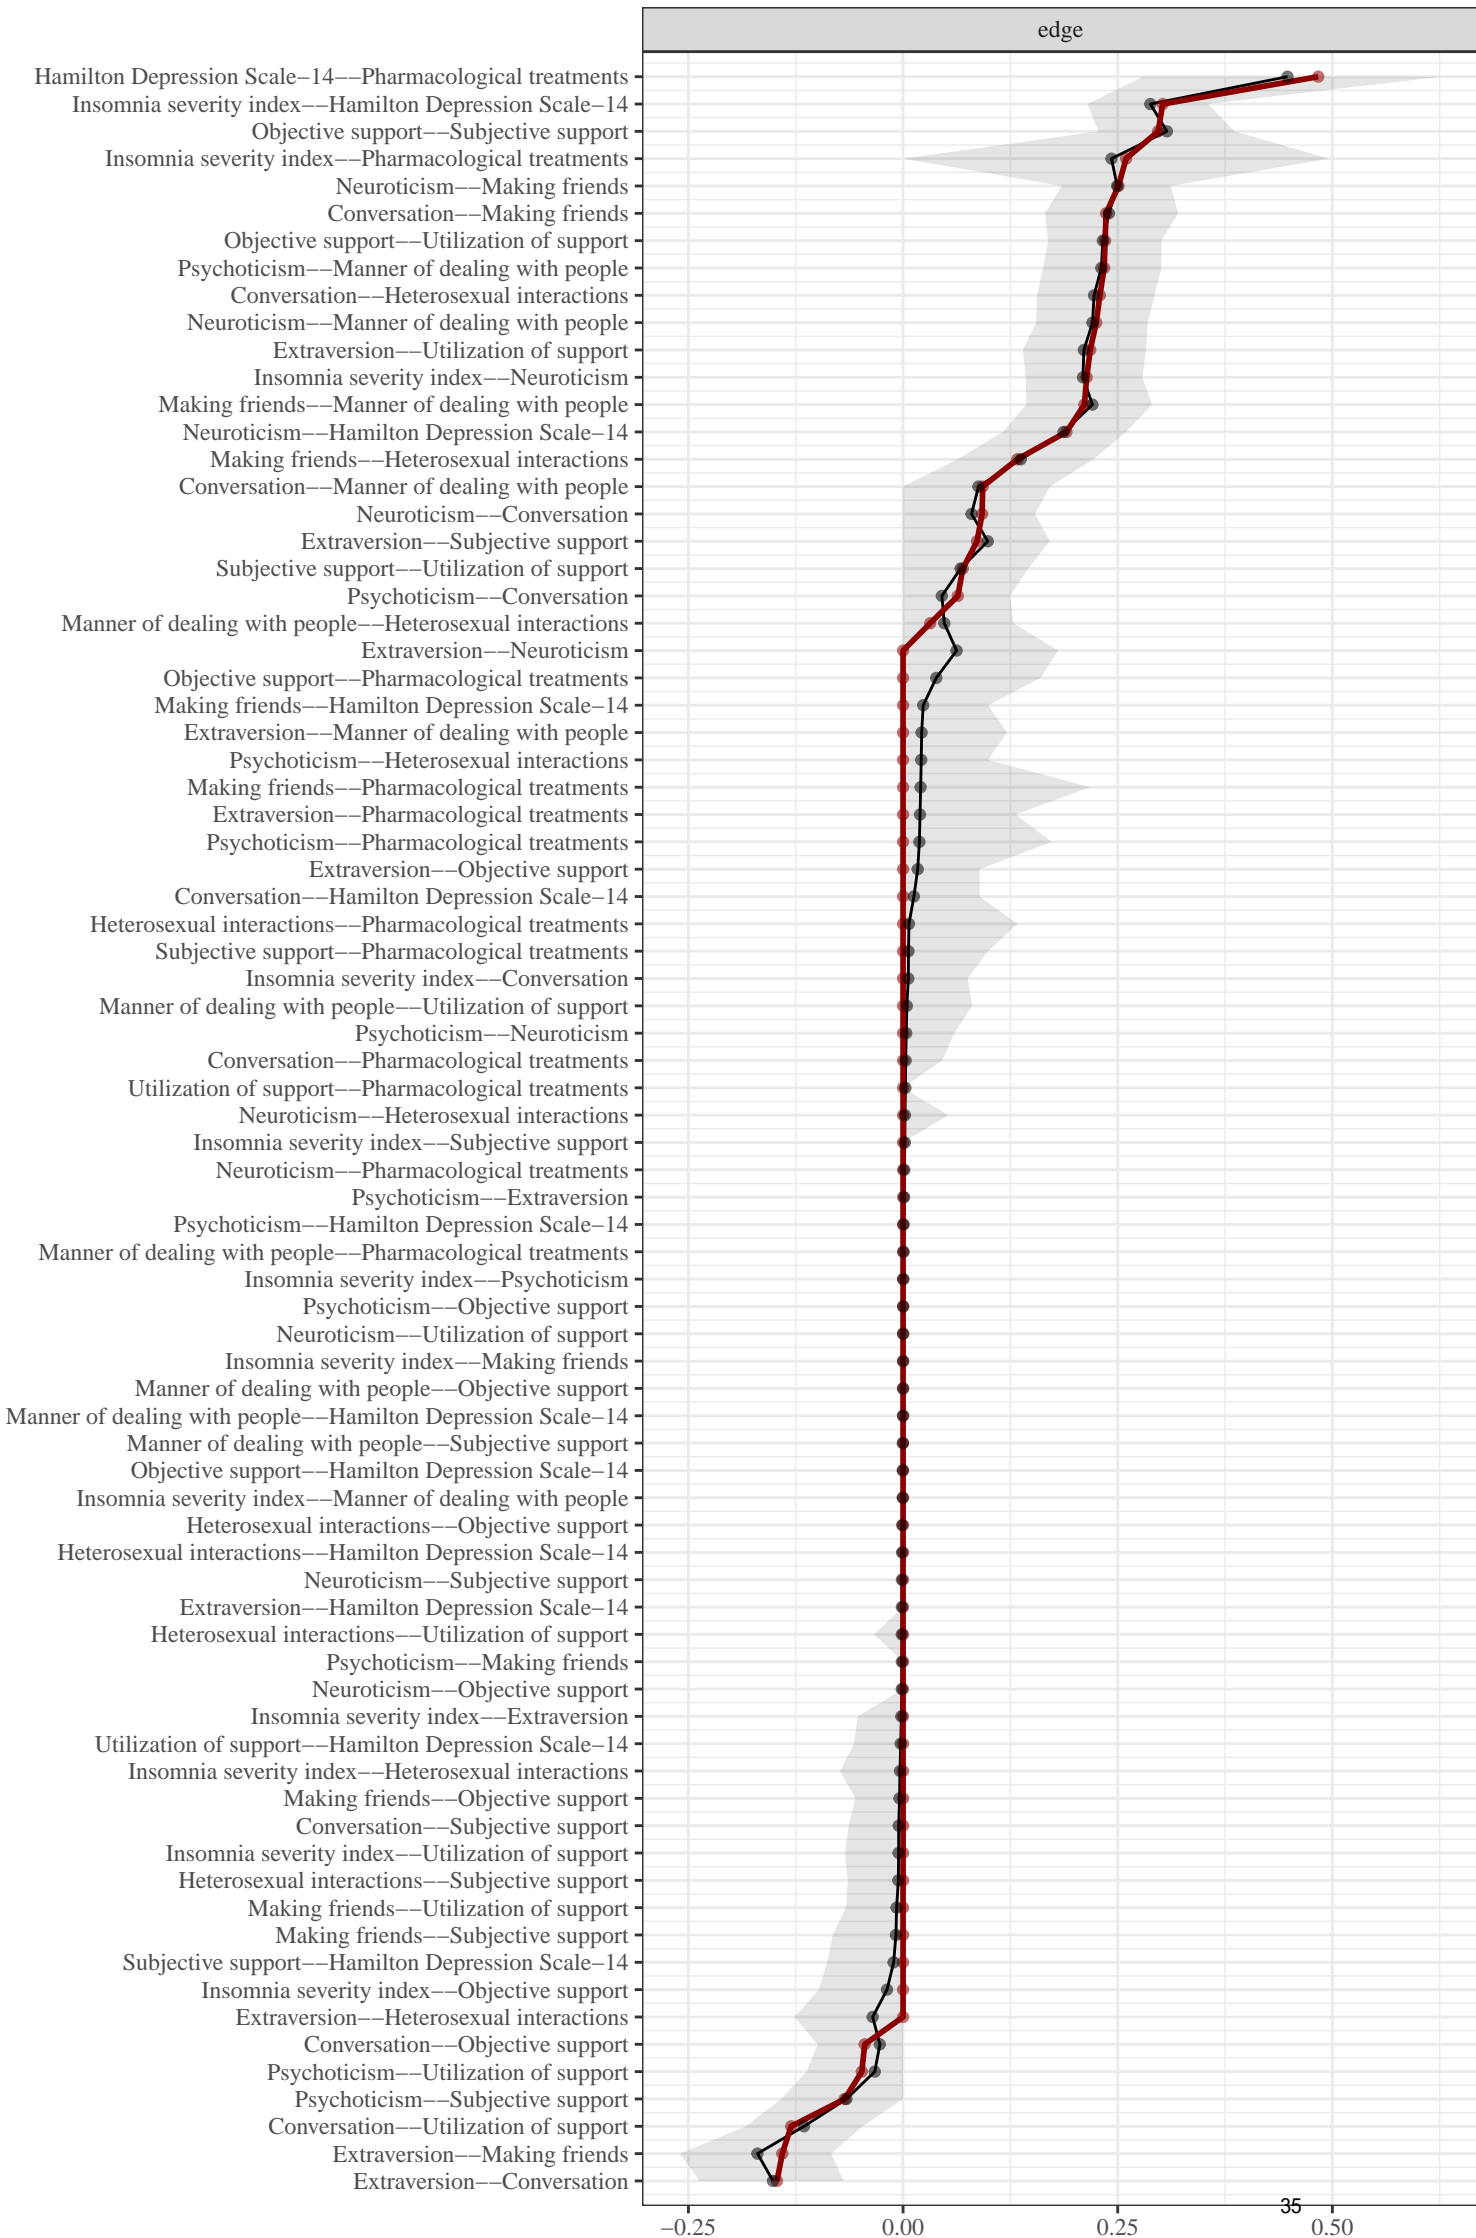

Figure S52. Bootstrapped confidence intervals of estimated edge-weights for the network of total ISI score and associated integrated psychosocial factors with covariates. Notes: The gray area represents the bootstrapped confidence intervals (CIs). The vertical axis represents the edges between each pair of nodes while the horizontal axis represents the edge weight.

● Bootstrap mean ● Sample

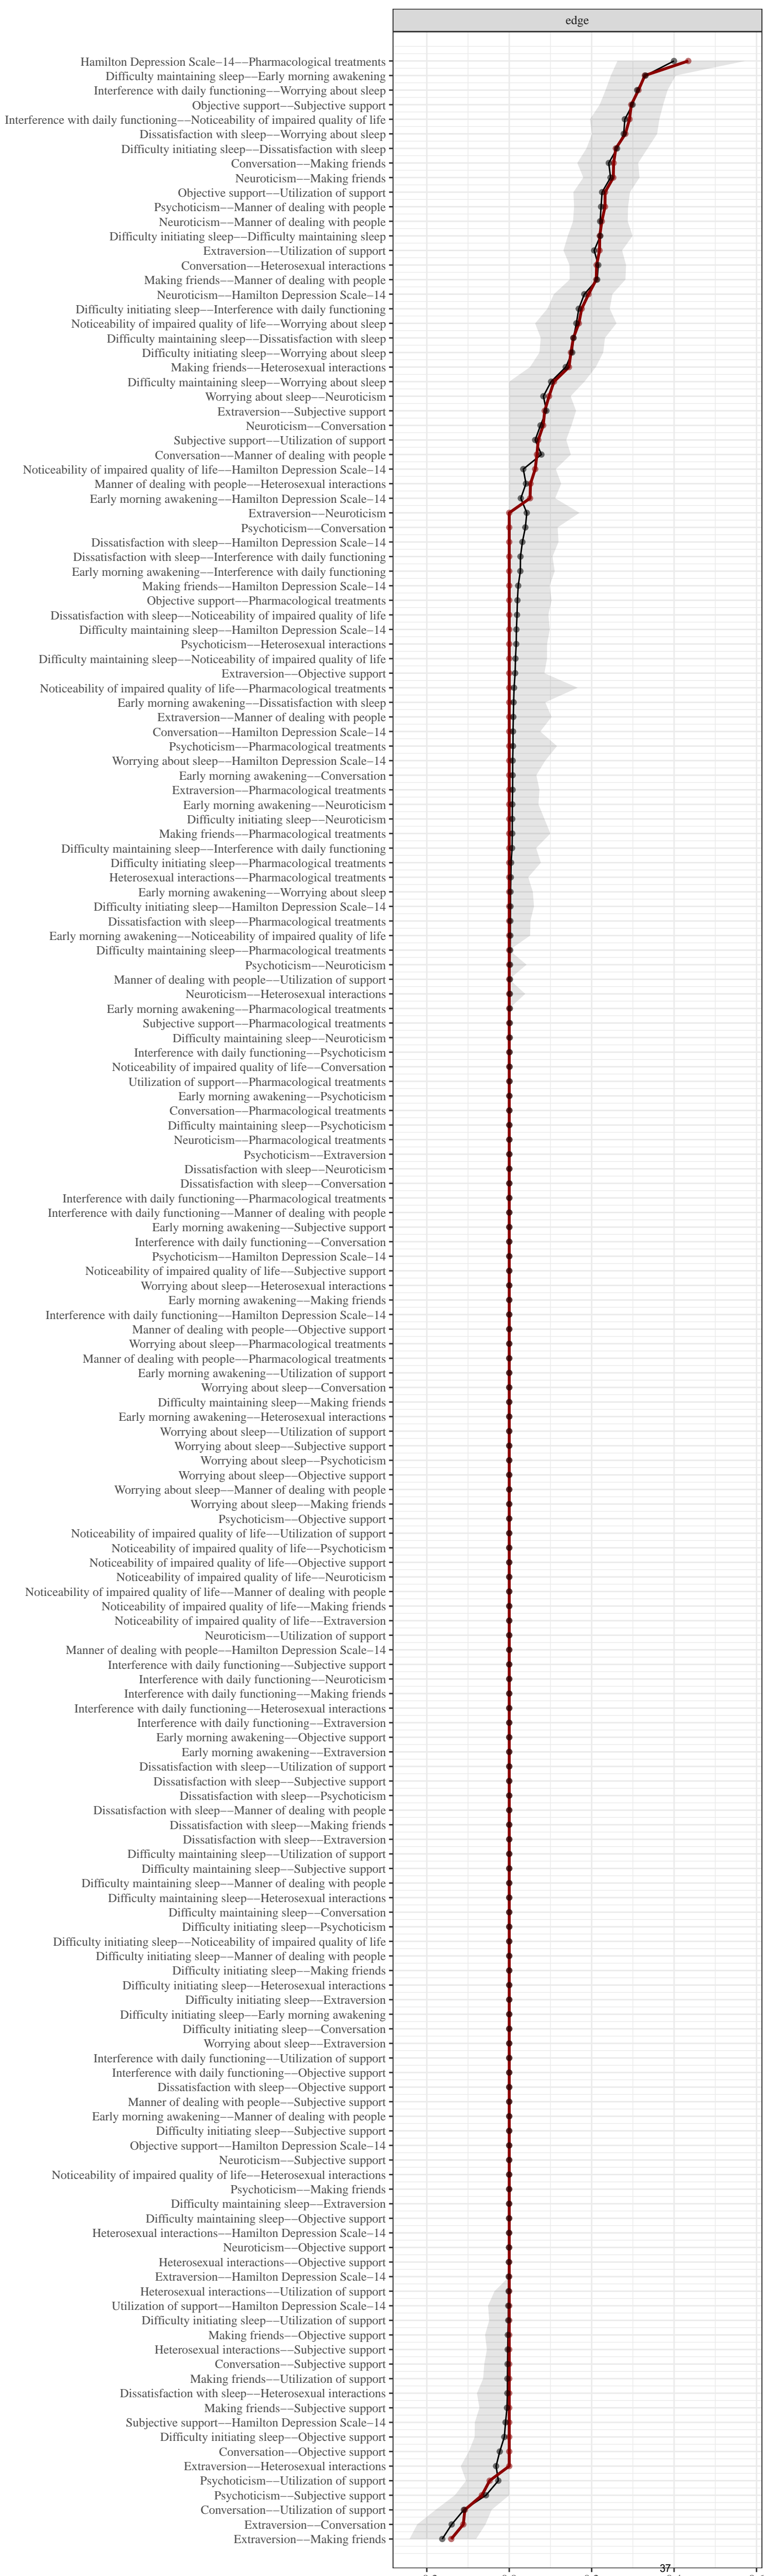

Figure S53. Bootstrapped confidence intervals of estimated edge-weights for the network of insomnia symptoms and associated integrated psychosocial factors with covariates.

Notes: The gray area represents the bootstrapped confidence intervals (CIs). The vertical axis represents the edges between each pair of nodes while the horizontal axis represents the edge weight.
